# Supplementary material for: Bee (Hymenoptera: Apoidea: Anthophila) roadkill across Texas, United States of America, compared with other studies
Source: Research Square preprint supplement (doi:10.21203/rs.3.rs-8656064/v1), 2026-02-09
Supplement: Supplementary file 1 [file 5d1921f2548ad6c8f5d639ba.pdf]

## **Bee (Hymenoptera: Apoidea: Anthophila) roadkill across Texas, United States of America, compared with other studies**

### **Supplement**

---

James L. Tracy  
Knowledge Engineering Laboratory  
Department of Entomology  
Texas A&M University  
College Station, Texas, USA  
[James.Tracy@ag.tamu.edu](mailto:James.Tracy@ag.tamu.edu)

Shelby K. Kilpatrick  
Department of Entomology  
Texas A&M University  
College Station, Texas, USA  
[SK\\_Kilpatrick@tamu.edu](mailto:SK_Kilpatrick@tamu.edu)

Karen Wright  
Plant Protection Division  
Washington State Department of Agriculture  
Olympia, Washington, USA  
[Karen.Wright@agr.wa.gov](mailto:Karen.Wright@agr.wa.gov)

Elise V. Voltura  
Schubot Center for Avian Health  
Veterinary Medicine and Biomedical  
Sciences  
Texas A&M University  
College Station, Texas, USA  
[EVVoltura@tamu.edu](mailto:EVVoltura@tamu.edu)

Anna-Capri Perez  
Tetra-Tech  
Houston, Texas, USA  
[AnnaCapri.Perez@outlook.com](mailto:AnnaCapri.Perez@outlook.com)

Jasper Klein  
Education Department  
Portland Parks and Recreation  
Portland, Oregon, USA  
[JasperTraneKlein@gmail.com](mailto:JasperTraneKlein@gmail.com)

Adrienne Brundage  
Department of Entomology  
Texas A&M University  
[Adrienne.Brundage@ag.tamu.edu](mailto:Adrienne.Brundage@ag.tamu.edu)

Robert N. Coulson  
Knowledge Engineering Laboratory  
Department of Entomology  
Texas A&M University  
[Robert.Coulson@ag.tamu.edu](mailto:Robert.Coulson@ag.tamu.edu)

## Materials and methods

### Roadkill surveys and sampling design

Texas roadkill surveys for Spring 2020 comprised five trips, ranging from three to five days long each (22 days total), that were conducted every other week between 30 March and 28 May 2020. The Autumn 2020 field season consisted of a total of five trips, ranging from four to five days long each (24 days total), were conducted about every other week between 12 October and 24 November 2020. Similarly, in Spring 2021, a total of six trips, ranging from one to five days long each (26 days total), were conducted approximately every other week between 22 March and 21 May 2021.

Three different categories of localities for transects were established based on criteria outlined below: Dispersed, Adventitious, and Special Adventitious. In the Spring 2020 and Spring 2021 field seasons, Dispersed localities were spaced by at least 60 road km and up to 100 road km apart at maximum (~37–62 road mi; approximately every 80 road km / 50 road mi on average) and at roadside milkweed stands when feasible. In Autumn 2020, the distance between Dispersed localities was reduced to every 25 road km to 50 road km at maximum (~15–31 road mi; approximately every 38 km or 23 mi on average). During all field seasons, Adventitious localities were designated between the Dispersed localities, either once or twice a day when time allowed, and when either a large milkweed stand and/or less common milkweed species was observed along the road. Special Adventitious localities were only sampled in Autumn 2020, upon request by the Texas Department of Transportation (TxDOT), and primarily to provide additional monarch roadkill data.

Localities for transects were not located within urban areas (e.g., cities) and measurements between transect sites did not include distances driven through urban environments. All roadside transects measured 100 m long by 1 m wide. Transect sites were never surveyed more than once, within or between field seasons. Most localities were sampled with a transect on a single side of the road. Localities were also periodically sampled with transects on both sides of the road (i.e., two-sided road transects), when at least one side had a milkweed stand (during Spring field seasons) and/or as time allowed. In general, when only one side of the road was sampled at a locality, the transect was on the right side of the vehicle based on the direction being driven (i.e., the passenger's side of the vehicle). Handheld Global Positioning System (GPS) units were used to record approximate geographic centroids for each transect to generate a spatially explicit dataset. The side(s) of road sampled were assigned to the nearest cardinal direction (i.e., north, south, east, and/or west) they faced. Cardinal directions were frequently estimated in the field based on the road orientation and direction of travel, in comparison to cell phone Google Maps data. Cardinal directions were also assigned, corrected, or standardized as needed using visual assessment of the transects' geographic centroids, road orientation, and the direction of travel as indicated by adjacent transect numbers in Google Earth. For simplicity of data curation, since there were only two sides of the road at each locality, the transect data from north and west sides, and the transect data from south and east sides of roads, were arbitrarily combined into "North" and "South" categories, respectively. Roadkill was counted on both sides of the road for 27 of the 508 total roadkill transects in this study. Six of the 27 two-sided transects had at least one transect with bees, and the North or West transect had an average 25% more bees than the South or East transect (range -100% to 100%). Most transects were North or West, and we

conservatively estimated the roadkill to be equal on both sides of the road for estimating roadkill rates per 100 m.

### Sample processing and specimen identification

The contents of each individual bag of roadkill sample materials were placed in a shallow foam tray and sorted by taxon using forceps. The parts of individual bee specimens were reassociated as frequently as possible (i.e., when they were available). This allowed a total number of individuals of each taxon in a sample to be counted before being returned to the bag. When whole or nearly complete bee specimens were not present for all or any individuals in a sample, counts were based on the greatest body parts available for the taxon (e.g., heads, thoraxes, sets of wings). In two instances (i.e., in Spring 2021 samples for transects 3AT37 and 4AT18), we were unable to confirm if the body parts available for the native bee taxa in the samples belonged to multiple individuals or not. To be conservative and avoid overcounting the number of individuals represented in these samples, we assumed that all the parts belonged to single individuals.

Bee specimens recovered in Autumn 2020 and Spring 2021 were determined by SKK in 2023 using an Olympus SZ51 Stereo Microscope equipped with an Olympus SZ2-ILST LED Illuminator Stand (Olympus Corporation, Tokyo, Japan). Bee specimens recovered in Spring 2020 were primarily determined by KWW. SKK identified Spring 2020 *Apis* specimens and reexamined all the season's samples to ensure bee specimens were accounted for, adding and reconfirming KWW's determinations as needed. SKK and KWW used previously determined bee specimens in the Texas A&M University Insect Collection (TAMUIC) as reference material.

SKK identified most bee specimens to family, tribe, or genus level using Michener et al. (1994). Additional genus keys were used for metallic green halictids (Maffei 2021) and Lithurgini (Gonzalez et al. 2013), and a subgenus key was used for *Centris* (Michener 2007). Species-level identifications were accomplished using a variety of taxon-specific resources, specifically: *Bombus* spp. (Colla et al. 2011; Koch et al. 2012; Williams et al. 2014; Texas Parks and Wildlife Department 2023), *Xylocopa* spp. (Mitchell 1962), *Agapostemon* spp. (Roberts 1972; Portman et al. 2022), *Augochloropsis* spp. (Portman et al. 2022), *Lithurgopsis* spp. (Snelling 1986), and *Centris* (*Paracentris*) spp. (Snelling 1984).

We follow classification based on Michener (2007), with exceptions based on the following recent studies. We follow Bossert et al. (2019) for subfamilies within Apidae, Freitas et al. (2023) for generic classification within Eucerini, Moure and Melo (2007) for generic classification within Lithurgini, and Williams et al. (2008) for subgeneric classification within *Bombus*. Within genera, taxon concepts were applied based on recent revisions and other taxonomic works: *Agapostemon* (Mitchell 1960; Roberts 1972; Portman et al. 2022), *Augochloropsis* (Mitchell 1960; Portman et al. 2022), *Lithurgopsis* (Snelling 1986), *Centris* (Snelling 1974, 1984), *Diadasia* (Timberlake 1941; Adlakha 1969), *Melissodes* (LaBerge 1961; Mitchell 1962), *Triepeolus* (Rightmyer 2008), *Dieunomia* (Cross 1958), *Nomia* (Mitchell 1960; Ribble 1965), *Megachile* (Mitchell 1937), *Osmia* (Sandhouse 1939; Michener 1949; Mitchell 1962; Rust 1974), *Xylocopa* (Hurd 1961; Mitchell 1962), and *Bombus* (Franklin 1913; Mitchell 1962; Milliron 1971, 1973a, b; Labougle 1990; Williams et al. 2014).

Notably, undescribed *Augochloropsis* spp. are present in Texas (Portman et al. 2022). Determinations past genus level were not made for Spring 2021 *Augochloropsis* specimens. However, determined Spring 2020 specimens are included at species-level [all *Augochloropsis* (*Paraugochloropsis*) *metallica sensu lato* (Fabricius 1793)] as they were identified prior to the

publication of Portman et al. (2022). For clarity, females of *Agapostemon* (*Agapostemon*) *angelicus* and *Ag. (Agapostemon) texanus* are “morphologically indistinguishable” from one another (Portman et al. 2022). Thus, while these two taxa are distinct species, we follow Portman et al.’s (2022) recommendation in reporting them as a single morphospecies because they both occur in Texas and only female specimens were represented at this taxonomic level in roadkill samples. Additionally, we treat *B. pennsylvanicus* and *B. sonorus* as distinct species as in other works (e.g., Franklin 1913; Warriner 2012), which is supported by a recent analysis of molecular data for Texas populations (Beckham et al. 2024). However, since these bumble bee taxa are also frequently treated as conspecifics or subspecies (e.g., Milliron 1973a; Williams et al. 2014), we opted to address them together as *B. pennsylvanicus sensu lato* in our dataset as well. Please refer to Warriner (2012) for additional citations pertaining to *B. pennsylvanicus* and *B. sonorus* in Texas; further study of the group will refine understanding of their phylogenetic relationships and geographic distributions.

### Cross-study comparisons

Of the 2,334 roadkill Anthophila collected in Knoxville, Tennessee by Russo (2025), 24 bees identified only to family level or higher (2 Halictidae and 22 Anthophila) were excluded from analysis, leaving 2,310 bees to consider. We extrapolated Tennessee bee roadkill per 0.75 km transect to 1 km, calculated the mean and standard deviation roadkill per km over sample dates, and then multiplied this mean and standard deviation by the sample size to obtain annual seasonal mean and standard deviation of bee roadkill, which was not originally reported.

Utah bee roadkill per taxa per driving route from Wilson et al. (2024) was calculated multiplying relative abundance of bees per driving route (their Table 2) by average bee roadkill estimates per route (their Table 1), before summing over all routes to calculate roadkill relative abundance per taxa. Utah bee roadkill data (their Table 1) was also used to calculate both average and minimum estimated numbers of bees hit per day per route by multiplying bees per car per km per route by estimated average or minimum number of daily cars during the bee flight period per route. The weighted mean values for Utah average and minimum estimated numbers of bees hit per day per route were first calculated for the multiple instances of some routes, using the mean route kilometers for each route as a weight. Then, the route-distance weighted mean for Utah estimated average and minimum numbers of bees hit per day per route was calculated and multiplied by the 3,461 km total of all driving routes and the number of days per season (total annual = 180, spring = 83, summer = 97) to yield total average and minimum estimated roadkill over Utah driving routes for various seasons.

Washington vehicular bee sweeper roadkill per kilometer was calculated by dividing the total kilometers surveyed per year into the bees captured as given in Table 1 of Vinchesi et al. (2018).

Qualitative comparisons of roadkill bee taxa at various taxonomic levels among this study and other studies were made using Microsoft Excel pie charts.

### Roadkill sampling methodologies and iNaturalist data

For the iNaturalist (2025a) occurrence data of the 23 bee genera among the Texas and Utah roadkill studies, we used accepted genus or species level identifications with the following criteria: (1) iNaturalist research grade quality species identifications, which have at least two agreeing identifications; (2) genus level verified occurrence data with two confirming genus

identifications, which is equivalent to research grade quality for species level identifications, but is not available for genus level identifications; and (3) verified occurrence data with an identification to at least genus by bee taxonomist John S. Ascher (ident\_user\_id=johnascher; <https://www.inaturalist.org/people/johnascher>). Observations with two or more agreeing genus identifications were most easily identified from non-research grade observations with at least two agreeing identifications in the downloaded tabular data (num\_identification\_agreements>1). Where only one agreeing identification was reported for a non-research grade identification (num\_identification\_agreements=1), we examined the online iNaturalist record to verify whether there still may be more than one agreeing identification for the genus, such as where one user identification may be the genus *Agapostemon* and another user identification may be of a particular *Agapostemon* sp. that remains unconfirmed. For accepted bee genus observations with duplicates for a given location, we kept the observation with research grade quality or with the highest number of agreeing genus identifications.

The Histogram Bin Ratio Weighting (*HBRWt*) sample bias correction method of Tracy et al. (2022) was used to adjust the iNaturalist occurrence records for the 23 bee genera according to human population density bias, considering how the distribution of occurrences of the larger Hymenoptera target group (verified observations with at least one identification) required numerical adjustment to match the distribution of random points within bins of human population density throughout the contiguous five state area of Utah, Colorado, Arizona, New Mexico, and Texas (Fig. S1). Data for each genus with at least two agreeing identifications were separately thinned to 1 km to reduce spatial autocorrelation, and the random and target group data were also thinned to 1 km. The proportions of *HBRWt* adjusted occurrences among the 23 bee genera were then compared between the roadkill survey areas in Utah and Texas (Fig. S1, Table S3).

## Results

### Texas roadkill relative abundance

Texas roadkill was greatest for the family Apidae and was estimated at 4.3M for autumn and spring 2020 (the following roadkill estimates in parentheses are all for 2020) (Table S4). Apidae roadkill in Texas was dominated by the subfamily Apinae (2.4M), including *Apis mellifera* (1.5M), *Xylocopa virginiana* (0.8M), *X. micans* (0.7M), *Bombus pensylvanicus* (0.3M), *Centris* sp. (0.18M), *B. griseocollis* (0.15M), *C. atripes* (black-legged oil digger), *C. caesalpiniae* (Caesalpinia oil digger), *B. impatiens*, and *B. sonorus*, followed by the long-horned bees subfamily Eucerinae (0.2M), including *Diadasia rinconis* (cactus bee), *Melissodes tristis* (dark-faced longhorn bee), and *Triepeolus pencilliferus*. Minor roadkill was estimated for the subfamily Anthophorinae, *Anthophora* (common digger bees). The family Halictidae (1.3M) was the next most common among Texas roadkill, dominated by *Agapostemon angelicus*/*Ag. texanus* (1M), and including *Augochloropsis metallica* (metallic epauletted-sweat bee) (0.15M), *Ag. splendens* (brown-winged striped sweat bee), *Augochloropsis* sp., *Dieunomia nevadensis* (Nevada nomia), and *Nomia nortoni* (Norton's alkali bee). Less common bee roadkill families included Andrenidae (e.g., *Andrena* sp.) (0.3M) and Megachilidae (0.3M), including *Osmia subfasciata* (0.15M), *Lithurgopsis littoralis* (cactus wood-borer bee), *Megachile inimica* (hostile leaf-cutter bee), and *O. texana* (Texas mason bee), with minor representation by Colletidae (*Colletes* sp.) (Figs. 2, 6c, 7a, 9a; Table S4).

## References

- Adlakha RL (1969) A systematic revision of the bee Genus *Diadasia* Patton in America North of Mexico (Hymenoptera: Anthophoridae). PhD dissertation, University of California, Davis, California, 24 pp. <https://www.proquest.com/dissertations-theses/systematic-revision-bee-genus-diadasia-patton/docview/302401982/se-2>
- Beckham JL, Johnson JA, Pfau RS (2024) Molecular data support *Bombus sonorus* and *Bombus pensylvanicus* (Hymenoptera, Apidae) as distinct species. *J Hymenopt Res* 97:895–914. <https://doi.org/10.3897/jhr.97.132937>
- Bossert S, Murray EA, Almeida EA, Almeida EAB, Brady SG, Blaimer BB, Danforth BN (2019) Combining transcriptomes and ultraconserved elements to illuminate the phylogeny of Apidae. *Mol Phylogenetics Evol* 130:121–131. <https://doi.org/10.1016/j.ympev.2018.10.012>
- Bouseman JK, LaBerge WE (1978) A revision of the bees of the genus *Andrena* of the Western Hemisphere. Part IX. Subgenus *Melandrena*. *Trans Am Entomol Soc* 104(3/4):275–389. <https://www.jstor.org/stable/25078228>
- Center for International Earth Science Information Network [CIESIN]. 2022. Gridded Population of the World, Version 4 (GPWv4): North American Population Density 2020, Revision 11, 0.008333 Degree [30 Arc Second, ~1 Km] Spatial Resolution. Columbia University, Palisades, New York. <https://doi.org/10.7927/H49C6VHW>; Accessed 12 January 2026
- Colla S, Richardson L, Williams P (2011) Bumble bees of the eastern United States. Stritch L, Adams LD (eds), USDA Forest Service and the Pollinator Partnership, Washington D.C., 104 pp. <https://www.pollinator.org/pollinator.org/assets/generalFiles/BumbleBeeGuide2011.pdf>
- Cross EA (1958) A revision of the bees of the subgenus *Epinomia* in the New World (Hymenoptera-Halictidae). *Univ Kans Sci Bull* 38(16):1261–1301. <https://doi.org/10.5962/bhl.part.10975>
- Darst AL, Mitchell TS, Verhoeven MR, Evans E, Tonsfeldt L, Kjaer S, Snell-Rood EC (2024) Diversity of bumble bees and butterflies in Minnesota roadsides depends on floral diversity and abundance but not floral native status. *Insect Conserv Divers* 17(4):690–701. <https://doi.org/10.1111/icad.12739>
- Evans E, Boone M, Cariveau D (2019) Monitoring and Habitat Assessment of Declining Bumble Bees in Roadsides in the Twin Cities Metro Area of Minnesota. Project CTS #2018003 Report No. MN/RC 2019-25, Minnesota Department of Transportation, St. Paul, Minnesota, 48 pp. <https://conservancy.umn.edu/bitstreams/8ae3c244-374d-4258-8d9c-969c50104f20/download>
- Foote GG, Foote NE, Runyon JB, Ross DW, Fettig, CJ (2020) Changes in the summer wild bee community following a bark beetle outbreak in a Douglas-fir forest. *Environ Entomol* 49(6):1437–1448. <https://doi.org/10.1093/ee/nvaa119>
- Franklin HJ (1913) The Bombidae of the New World. Part I. *Trans Am Entomol Soc* 38(1912):177–486. <https://archive.org/details/bombidaeofnewwor00fran/page/n13/mode/2up>
- Freitas FV, Branstetter MG, Franceschini-Santos VH, Dorchin A, Wright KW, López-Uribe MM, Griswold T, Silveira FA, Almeida EA (2023) UCE phylogenomics, biogeography, and classification of long-horned bees (Hymenoptera: Apidae: Eucerini), with insights on

- using specimens with extremely degraded DNA. *Insect Syst Divers* 7(3):1–21.  
<https://doi.org/10.1093/isd/ixad012>
- Gonzalez VH, Engel MS, Griswold TL (2013) The lithurgine bees of Australia (Hymenoptera: Megachilidae), with a note on *Megachile rotundipennis*. *J Melittology* 11:1–19.  
<https://doi.org/10.17161/jom.v0i11.4520>
- Gruver A, CaraDonna P (2021) Chicago bees: urban areas support diverse bee communities but with more non-native bee species compared to suburban areas. *Environ Entomol* 50(4):982–994. <https://doi.org/10.1093/ee/nvab048>
- Hurd PD (1961) A synopsis of the carpenter bees belonging to the subgenus *Xylocopoides* Michener (Hymenoptera; Apoidea). *Trans Am Entomol Soc* 87(4):247–257.  
<https://www.jstor.org/stable/25077825>
- iNaturalist (2025a) Verifiable observations of Hymenoptera from Texas, Utah, Arizona, Colorado, and New Mexico. <https://www.inaturalist.org/observations>. Accessed 12 January 2026
- Koch J, Strange J, Williams P (2012) Bumble bees of the western United States. Stritch L, Adams LD (eds), USDA Forest Service and the Pollinator Partnership, Washington D.C., 144 pp.  
<https://www.pollinator.org/pollinator.org/assets/generalFiles/BumbleBee.GuideWestern.FINAL.pdf>
- LaBerge WE (1961) A revision of the bees of the genus *Melissodes* in North and Central America. Part III (Hymenoptera, Apidae). *Univ Kans Sci Bull* 42(5):283–663.  
<https://doi.org/10.5962/bhl.part.9821>
- LaBerge WE (1977) A revision of the bees of the genus *Andrena* of the western hemisphere. Part VIII. Subgenera *Thysandrena*, *Dasyandrena*, *Psammandrena*, *Rhacandrena*, *Euandrena*, *Oxyandrena*. *Trans Am Entomol Soc* 103(1):1–143. <https://www.jstor.org/stable/25078201>
- LaBerge WE (1980) A revision of the bees of the genus *Andrena* of the western hemisphere. Part X. Subgenus *Andrena*. *Trans Am Entomol Soc* 106(4):395–525.  
<https://www.jstor.org/stable/25078273>
- LaBerge WE (1985) A revision of the bees of the genus *Andrena* of the western hemisphere. Part XI. Minor subgenera and subgeneric key. *Trans Am Entomol Soc* 111:441–567.  
<https://www.jstor.org/stable/25078376>
- LaBerge WE (1986) A revision of the bees of the genus *Andrena* of the Western Hemisphere. Part XII. Subgenera *Leucandrena*, *Ptilandrena*, *Scoliandrena* and *Melandrena*. *Trans Am Entomol Soc* 112(3):191–248. <https://www.jstor.org/stable/25078392>
- LaBerge WE (1989) A revision of the bees of the genus *Andrena* of the Western Hemisphere. Part XIII. Subgenera *Simandrena* and *Taeniandrena*. *Trans Am Entomol Soc* 115(1):1–56.  
<https://www.jstor.org/stable/25078446>
- Labougle JM (1990) *Bombus* of Mexico and Central America (Hymenoptera, Apidae). *Univ Kans Sci Bull* 54(3):35–73.  
<https://www.biodiversitylibrary.org/page/10604326#page/288/mode/1up>
- Larson DL, Pennarola N, Leone JB, Larson JL (2024) Fewer bowl traps and more hand netting can increase effective number of bee species and reduce excessive captures. *Ecol Evol* 14(2):p.e11036. <https://doi.org/10.1002/ece3.11036>
- LeBuhn G (2013) Field guide to the common bees of California, including bees of the western United States. California Natural History Guides, University of California Press, Berkeley, California, 192 pp. <https://www.jstor.org/stable/10.1525/j.ctt3fh31x>



- Maffei C (2021) North American halictid green bee genera quick guide: *Agapostemon*, *Augochloropsis*, *Augochlora*, *Augochlorella*. USGS Native Bee Inventory and Monitoring Lab, Laurel, MD.
- Michener CD (1949) A revision of the American species of *Diceratomia*. Ann Entomol Soc Am 42(3):258–264. <https://doi.org/10.1093/aesa/42.3.258>
- Michener CD (2007) The bees of the world, 2nd edn. John Hopkins University Press, Baltimore, Maryland, 953 pp. <https://static1.squarespace.com/static/5a849d4c8dd041c9c07a8e4c/t/5ad3bc968a922d44a4728936/1523825933048/Michener+2007+The+Bees+of+the+World.pdf>
- Michener CD, McGinley RJ, Danforth BN (1994) The bee genera of North and Central America (Hymenoptera: Apoidea). Smithsonian Institution Press, Washington D.C., 209 pp. [https://www.zportman.com/uploads/8/3/5/4/83540892/michener\\_et\\_al.\\_-1994-the\\_bee\\_genera\\_of\\_north\\_and\\_central\\_america\\_hymenoptera\\_apoidea.pdf](https://www.zportman.com/uploads/8/3/5/4/83540892/michener_et_al._-1994-the_bee_genera_of_north_and_central_america_hymenoptera_apoidea.pdf)
- Milliron HE (1971) A monograph of the Western Hemisphere bumble bees (Hymenoptera: Apidae; Bombinae), I. Mem Entomol Soc Am 103(S82):1–80. <https://doi.org/10.4039/entm10382fv>
- Milliron HE (1973a) A monograph of the Western Hemisphere bumble bees (Hymenoptera: Apidae; Bombinae), II. Mem Entomol Soc Am 105(S89):81–235. <https://doi.org/10.4039/entm10589fv>
- Milliron HE (1973b) A monograph of the Western Hemisphere bumble bees (Hymenoptera: Apidae; Bombinae), III. Mem Entomol Soc Am 105(S91):239–333. <https://doi.org/10.4039/entm10591fv>
- Mitchell TB (1937) A revision of the genus *Megachile* in the Nearctic Region Part VII. Taxonomy of the subgenus *Sayapis* (Hymenoptera: Megachilidae). Trans Am Entomol Soc 63(2):175–206, pls. XII–XIII. <https://www.jstor.org/stable/25077393>
- Mitchell TB (1960) Bees of the eastern United States: Volume I. N C Agric Exp Stn Tech Bull 141:1–538. <https://archive.org/details/beesofeasternuni0001theo>
- Mitchell TB (1962) Bees of the eastern United States: Volume II. N C Agric Exp Stn Tech Bull 152: 1–557. <https://archive.org/details/beesofeasternuni00mitc>
- Moure JS, Melo GAR (2007) Lithurgini Newman, 1834, online version. In: Moure, J.S., Urban, D., Melo, G.A.R. (eds), Catalogue of bees (Hymenoptera, Apoidea) in the Neotropical region. Sociedade Brasileira de Entomologia, Curitiba, Brazil. <https://moure.cria.org.br/catalogue?id=87369>. Accessed 13 July 2023
- Portman ZM, Arduser M, Lane IG, Cariveau DP (2022) A review of the *Augochloropsis* (Hymenoptera, Halictidae) and keys to the shiny green Halictinae of the midwestern United States. ZooKeys 1130:103–152. <https://doi.org/10.3897/zookeys.1130.86413>
- Rhoades PR, Davis TS, Tinkham WT, Hoffman CM (2018) Effects of seasonality, forest structure, and understory plant richness on bee community assemblage in a southern Rocky Mountain mixed conifer forest. Ann Entomol Soc Am 111(5):278–284. <https://doi.org/10.1093/aesa/say021>
- Ribble DW (1965) A revision of the banded subgenera of *Nomia* in America (Hymenoptera, Halictidae). Univ Kans Sci Bull 45(3):277–359. <https://www.biodiversitylibrary.org/page/2986186#page/285/mode/1up>
- Rightmyer MG (2008) A review of the cleptoparasitic bee genus *Triepeolus* (Hymenoptera: Apidae)—Part I. Zootaxa 1710: 1–170. <https://doi.org/10.11646/zootaxa.1710.1.1>



- Roberts RB (1972) Revision of the bee genus *Agapostemon* (Hymenoptera: Halictidae). Univ Kans Sci Bull 49(9):437–590.  
<https://www.biodiversitylibrary.org/page/4385442#page/10/mode/1up>
- Russo L (2025) Roadside surveys as a method for nonlethal insect monitoring. Psyche: J Entomol 2025:8881730. <https://doi.org/10.1155/psyc/8881730>
- Rust RW (1974) The systematics and biology of the genus *Osmia*, subgenera *Osmia*, *Chalcosmia*, and *Cephalosmia* (Hymenoptera: Megachilidae). Wasmann J Biol 32:1–93.  
<https://digitalcollections.usfca.edu/digital/collection/p15129coll11/id/647>
- Sandhouse GA (1939) The North American bees of the genus *Osmia* (Hymenoptera: Apoidea). Mem Entomol Soc Wash 1:1–167.  
<https://babel.hathitrust.org/cgi/pt?id=wu.89042665943&seq=1>
- Smith DiCarlo LA, DeBano SJ, Burrows S (2020) Arid grassland bee communities: associated environmental variables and responses to restoration. Restor Ecol 28:A54–A64.  
<https://doi.org/10.1111/rec.13074>
- Snelling RR (1974) Notes on the distribution and taxonomy of some North American *Centris* (Hymenoptera: Anthophoridae). Contrib Sci Nat Hist Mus Angeles Cty 259:1–41.  
<https://doi.org/10.5962/p.208114>
- Snelling RR (1984) Studies on the taxonomy and distribution of American centridine bees (Hymenoptera: Anthophoridae). Contrib Sci Nat Hist Mus Angeles Cty 347:1–69.  
<https://doi.org/10.5962/p.208171>
- Snelling RR (1986) The taxonomic status of two North American *Lithurge* (Hymenoptera: Megachilidae). Bull South Calif Acad Sci 85(1):29–34.  
<https://www.biodiversitylibrary.org/page/34161637#page/31/mode/1up>
- St. Clair AL, Zhang G, Dolezal AG, O’Neal ME, Toth AL (2020) Diversified farming in a monoculture landscape: effects on honey bee health and wild bee communities. Environ Entomol 49(3):753–764. <https://doi.org/10.1093/ee/nvaa031>
- Stein DS, Debinski DM, Pleasants, JM, Toth AL (2020) Evaluating native bee communities and nutrition in managed grasslands. Environ Entomol 49(3):717–725.  
<https://doi.org/10.1093/ee/nvaa009>
- Strange JP, Tripodi AD (2019) Characterizing bumble bee (*Bombus*) communities in the United States and assessing a conservation monitoring method. Ecol Evol 9(3):1061–1069.  
<https://doi.org/10.1002/ece3.4783>
- Tayal M, Wilson C, de la Plata ZM, Cieniewicz E (2025) Bee diversity and abundance during peach bloom in South Carolina, United States. J Appl Entomol 149(1):23–35.  
<https://doi.org/10.1111/jen.13353>
- Texas Parks and Wildlife Department (2023) Bumble bee identification.  
[https://tpwd.texas.gov/huntwild/wild/wildlife\\_diversity/nongame/native-pollinators/bumblebee-id.phtml](https://tpwd.texas.gov/huntwild/wild/wildlife_diversity/nongame/native-pollinators/bumblebee-id.phtml). Accessed 12 January 2026
- Thorp RW, LaBerge WE (2005a) A revision of the bees of the genus *Andrena* of the Western Hemisphere; Part XIV—Subgenus *Onagrandrena*. Ill Nat Hist Surv Bull 37:1–64.  
<https://doi.org/10.21900/j.inhs.v37.119>
- Thorp RW, LaBerge WE (2005b) A revision of the bees of the genus *Andrena* of the Western Hemisphere; Part XV—Subgenus *Hesperandrena*. Ill Nat Hist Surv Bull 37:65–94.  
<https://doi.org/10.21900/j.inhs.v37.120>

- Timberlake PH (1941) Synoptic table of North American species of *Diadasia* (Hymenoptera: Apoidea). Bull Brooklyn Entomol Soc 36(1):2–11.  
<https://www.biodiversitylibrary.org/page/50573791#page/11/mode/1up>
- Tracy J, Birt A, McFalls J, Prozzi J, Coulson R (2022) Evaluating Fall Monarch Butterfly Roadkill Hotspot Incidence and Potential Roadkill Mitigation. Project 0-7022 Final Report No. FHWA/TX-22/0-7022-R1, Texas Department of Transportation, Austin, Texas, 548 pp. <https://static.tti.tamu.edu/tti.tamu.edu/documents/0-7022-PSR.pdf>
- Vinchesi A, Walsh D, Broadhead C (2018) Assessing transportation impacts to alkali bees (Hymenoptera: Halictidae) and alfalfa seed production in southeastern Washington State. Am Entomol 64(1):52–58. <https://doi.org/10.1093/ae/tmy011>
- Warriner MD (2012) Bumble bees (Hymenoptera: Apidae) of Texas: historical distributions. Southwest Nat 57(4):442–445. <https://doi.org/10.1894/0038-4909-57.4.442>
- Williams PH, Cameron SA, Hines HM, Cederberg B, Rasmont P (2008) A simplified subgeneric classification of the bumblebees (genus *Bombus*). Apidologie 39:46–74.  
<https://doi.org/10.1051/apido:2007052>
- Williams PH, Thorp RW, Richardson LL, Colla S (2014) Bumble bees of North America: An identification guide. Princeton University Press, Princeton, NJ, 208 pp.  
[https://www.researchgate.net/publication/259460549\\_Bumble\\_Bees\\_of\\_North\\_America\\_An\\_Identification\\_Guide](https://www.researchgate.net/publication/259460549_Bumble_Bees_of_North_America_An_Identification_Guide)
- Wilson JS, Porter T, Messinger Carril O (2024) Are vehicle strikes causing millions of bee deaths per day on western United States roads? Preliminary data suggests the number is high. Sustain Environ 10:2424064. <https://doi.org/10.1080/27658511.2024.2424064>

## Figures

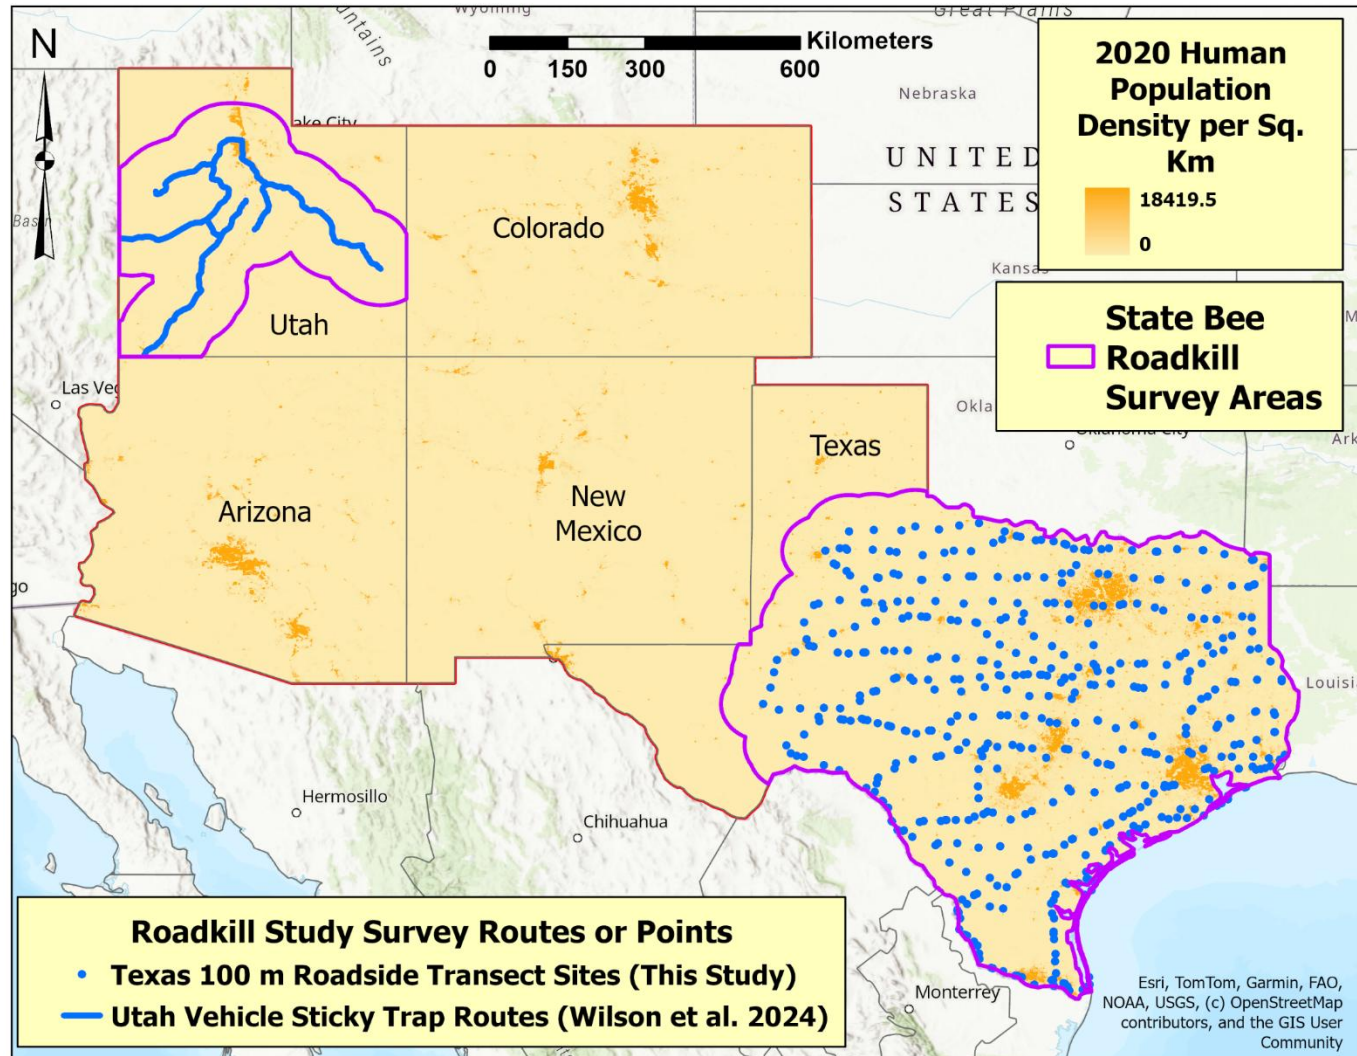

**Fig. S1** Bee roadkill survey areas in Texas (this study), showing 100m roadside transects, and Utah (Wilson et al. 2024), showing roadway survey routes for vehicle-mounted sticky traps, including associated 70 km buffer roadkill survey areas over a background raster of 1 km resolution 2020 population density (CIESIN 2022) for five state area that was used in calibrating weightings for human population sample bias adjustments of iNaturalist (2025a) data

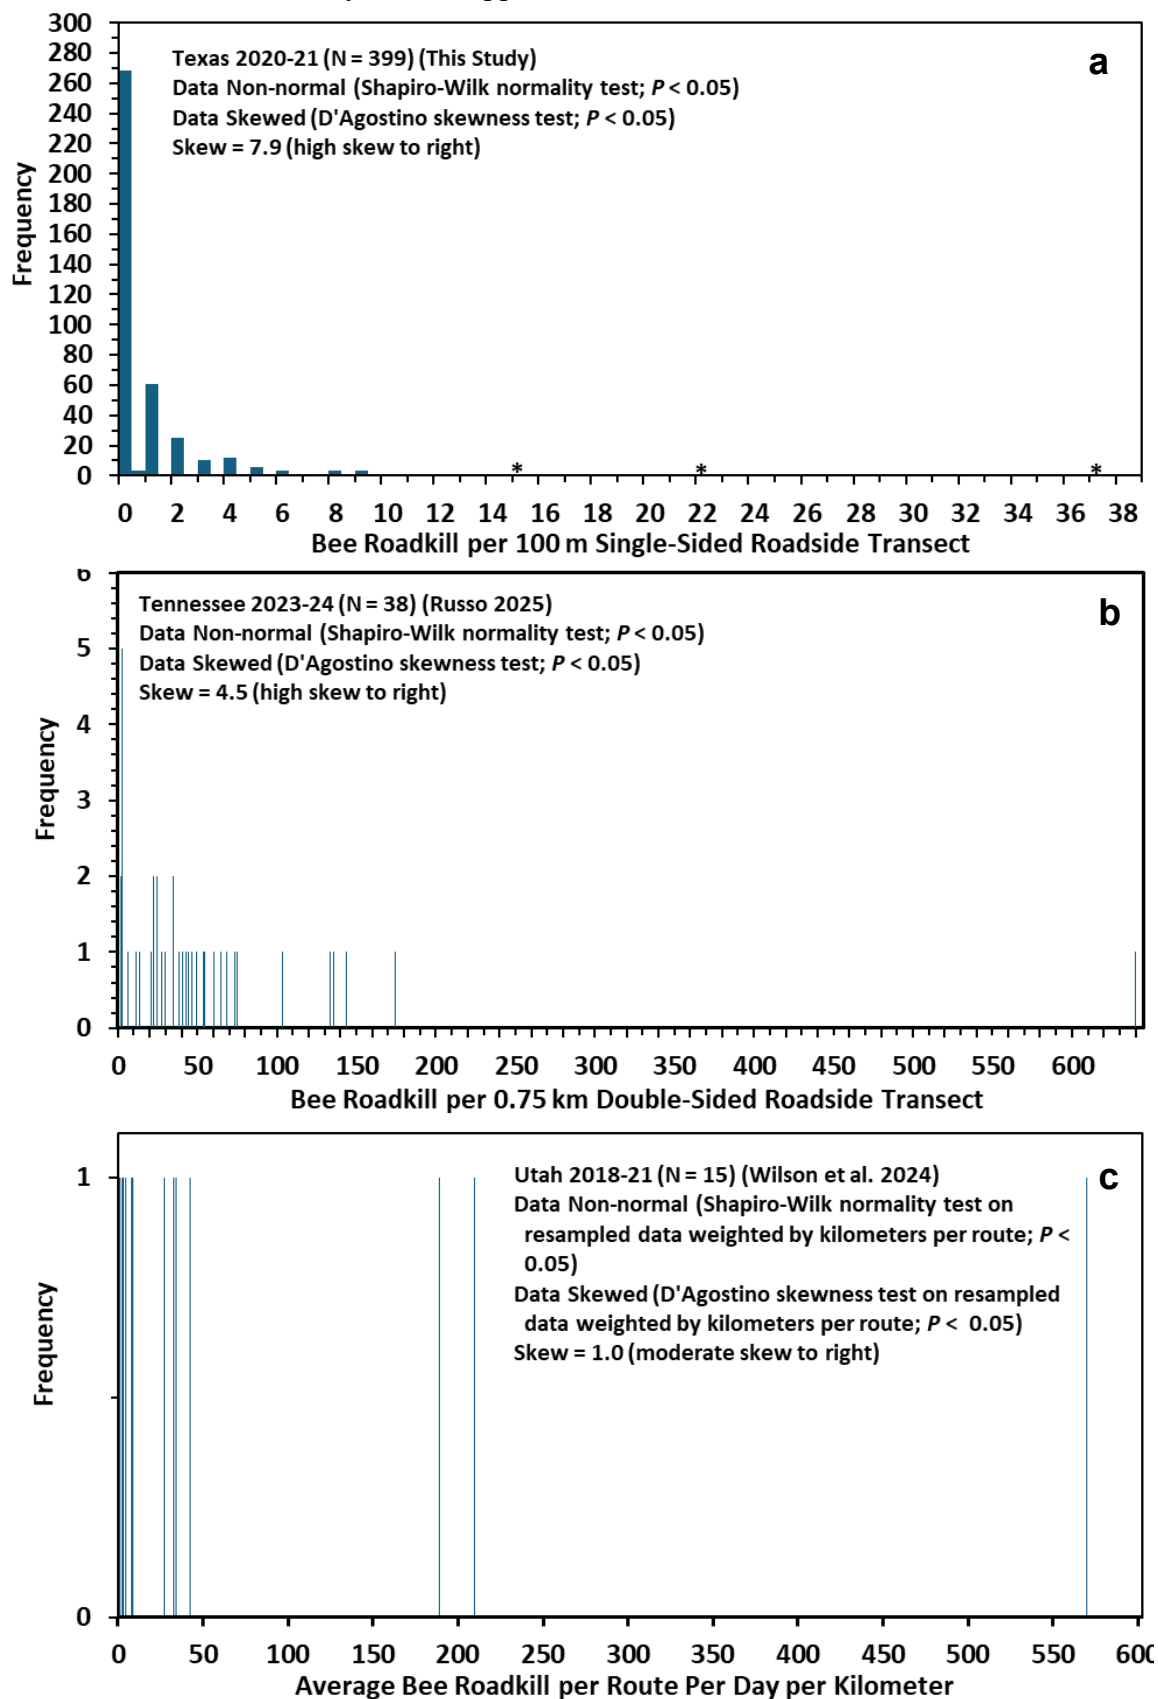

**Fig. S2** Frequency histogram of values for bee roadkill per transect for (a) Texas (this study) and (b) Knoxville, Tennessee (Russo 2025) (asterisk indicates a value of “1”), and (c) average bee roadkill per driving route per day per kilometer for Utah (Wilson et al. 2024)

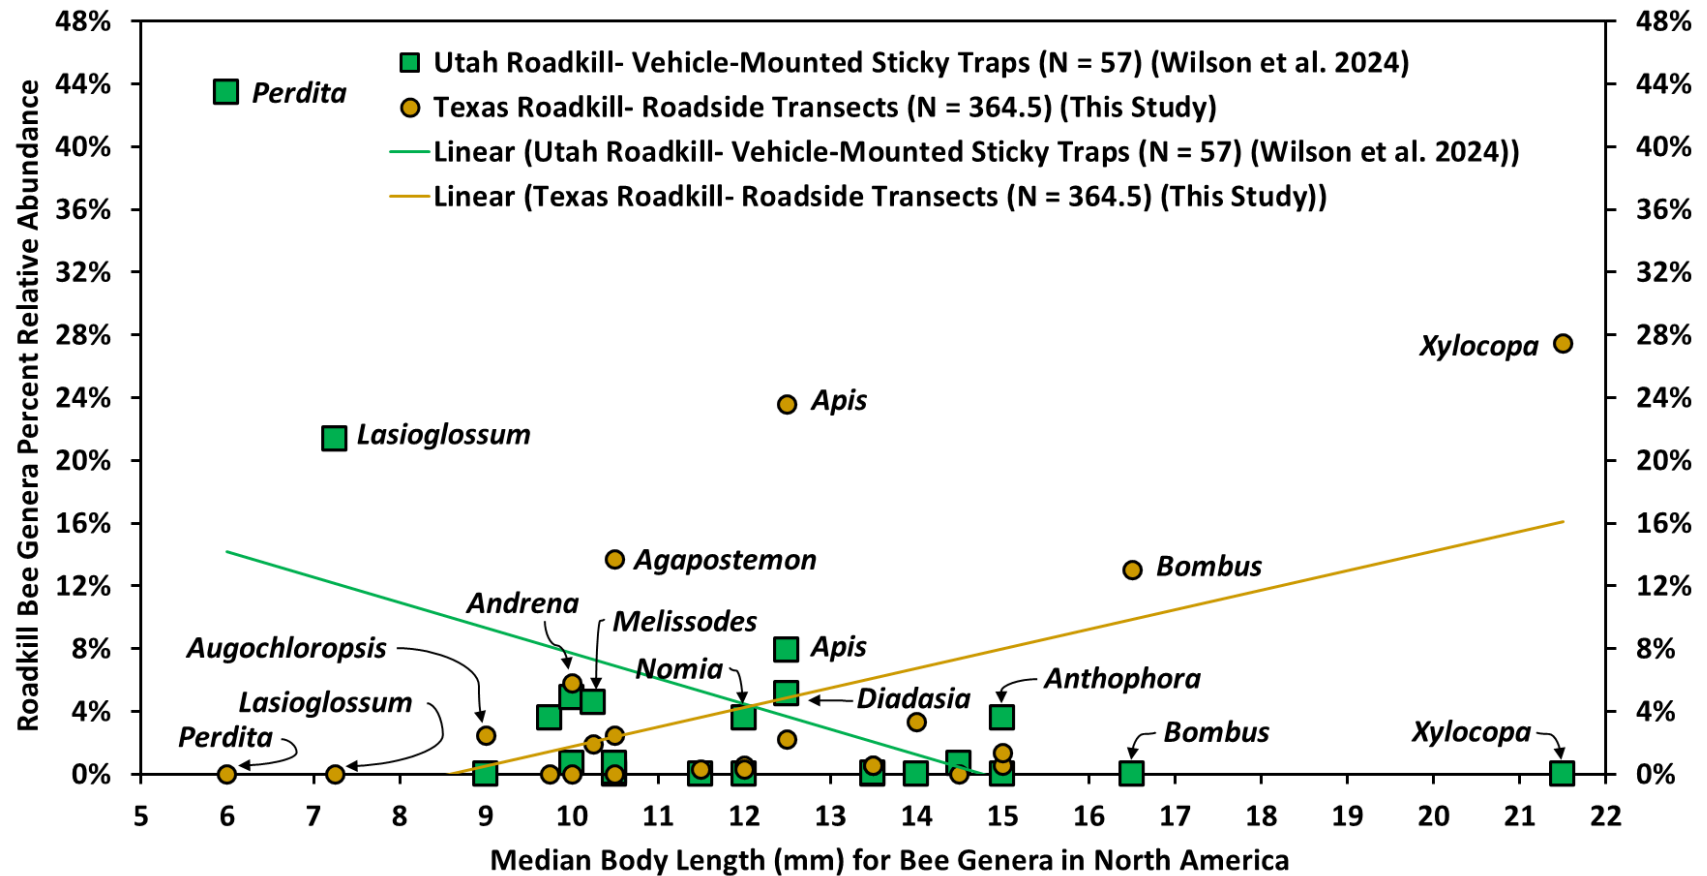

**Fig. S3** Scatterplots of identifiable roadkill bee genera relative abundance versus median body length for genera in North America from Utah vehicle-mounted sticky traps (Wilson et al. 2024) and Texas roadside transects (this study). Only more abundant bee roadkill genera are labeled (N = number bees; see Tables S2–4 for data; see Fig. 10a for bar chart of data)

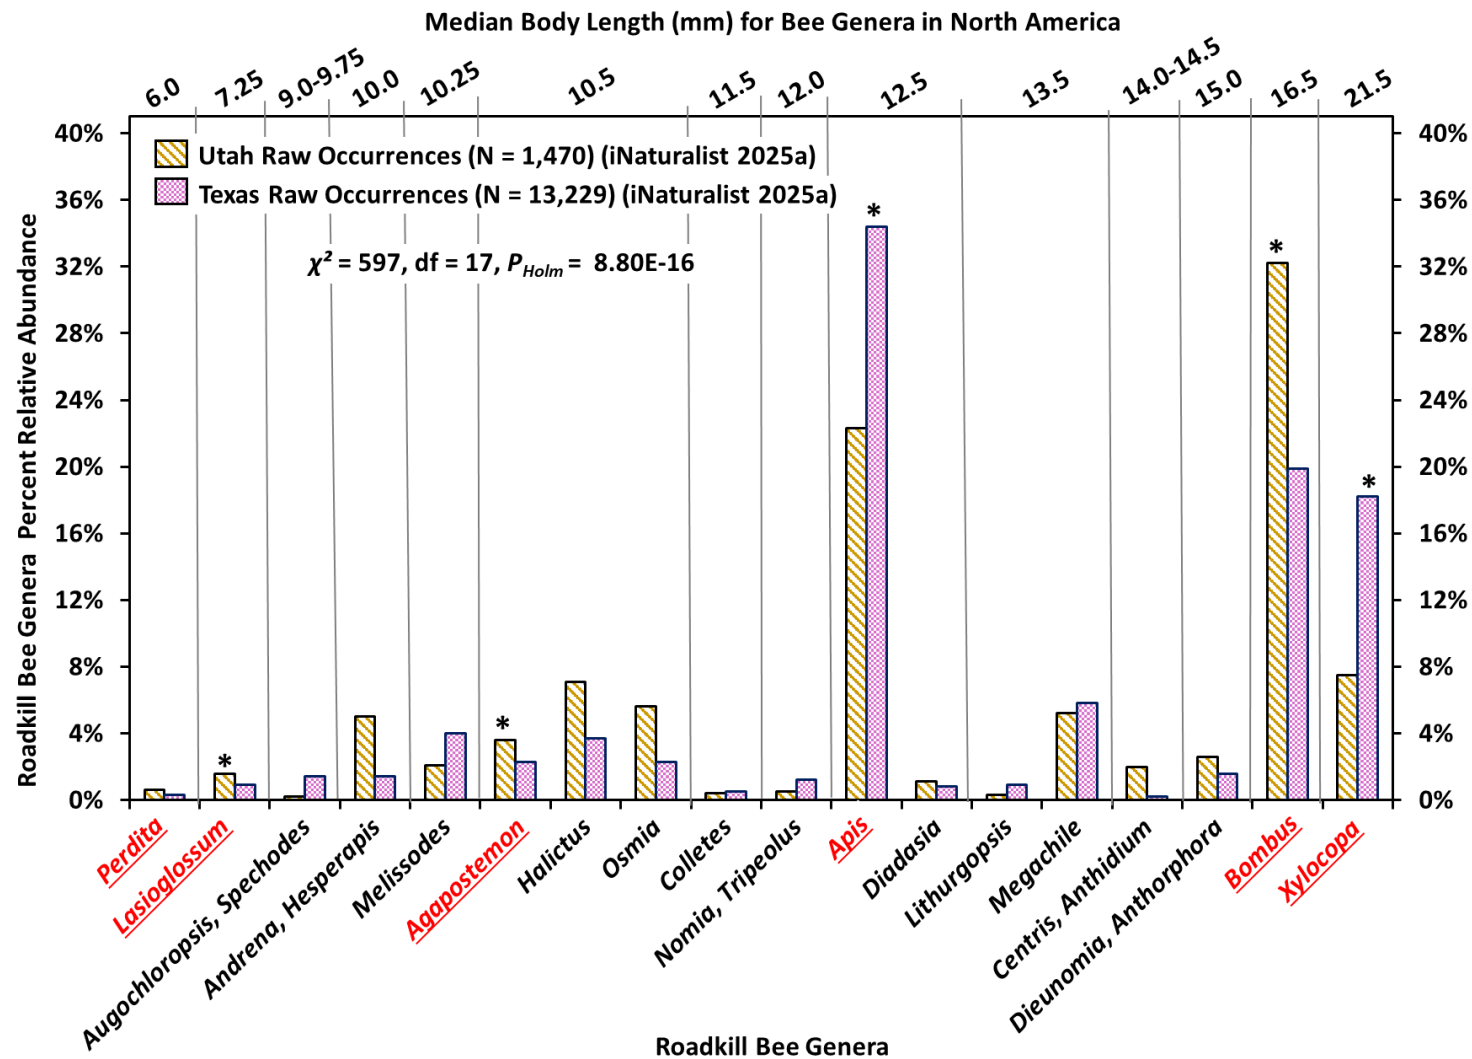

**Fig. S4** Bee roadkill genera relative abundance according to median body length in North America from confirmed iNaturalist (2025a) genus sample raw occurrences for Utah and Texas (N = number bees). Asterisk in the six red underlined genus groups indicates significant difference in relative abundance among all genera for Utah versus Texas ( $P_{Holm} < 0.05$ ; Chi-square test for independence with Holm's correction, followed by proportion tests with Holm's correction) (see Tables S2–4 for data; see Fig. 10b for same chart with sample bias adjusted data)



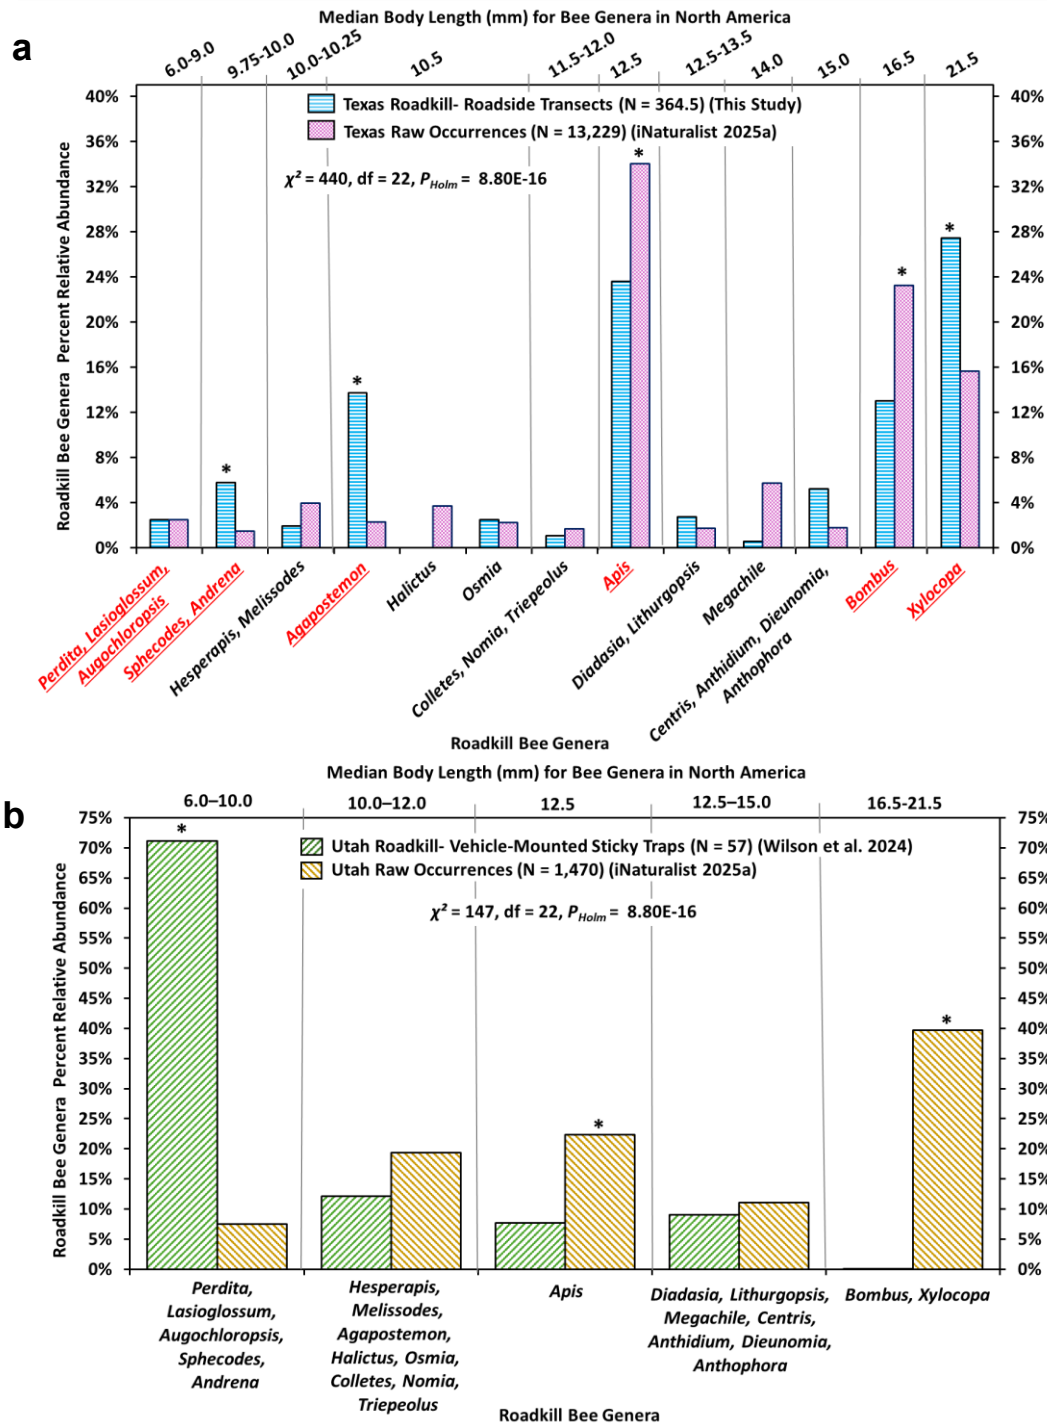

**Fig. S5** Bee roadkill genera relative abundance according to median body length in North America for roadkill from (a) Texas roadside transects (this study) or (b) Utah vehicle-mounted sticky traps (Wilson et al. 2024) and confirmed iNaturalist (2025a) raw genus occurrences for (a) Texas and (b) Utah (N = number bees). Asterisk in (a) six red underlined genus groups or (b) any genus group indicates significant difference in roadkill versus occurrence relative abundance among all genera ( $P_{Holm} < 0.05$ ; Chi-square test for independence with Holm's correction, followed by proportion tests with Holm's correction) (see Tables S2–4 for data; see Fig. 11 for same charts with sample bias adjusted data)



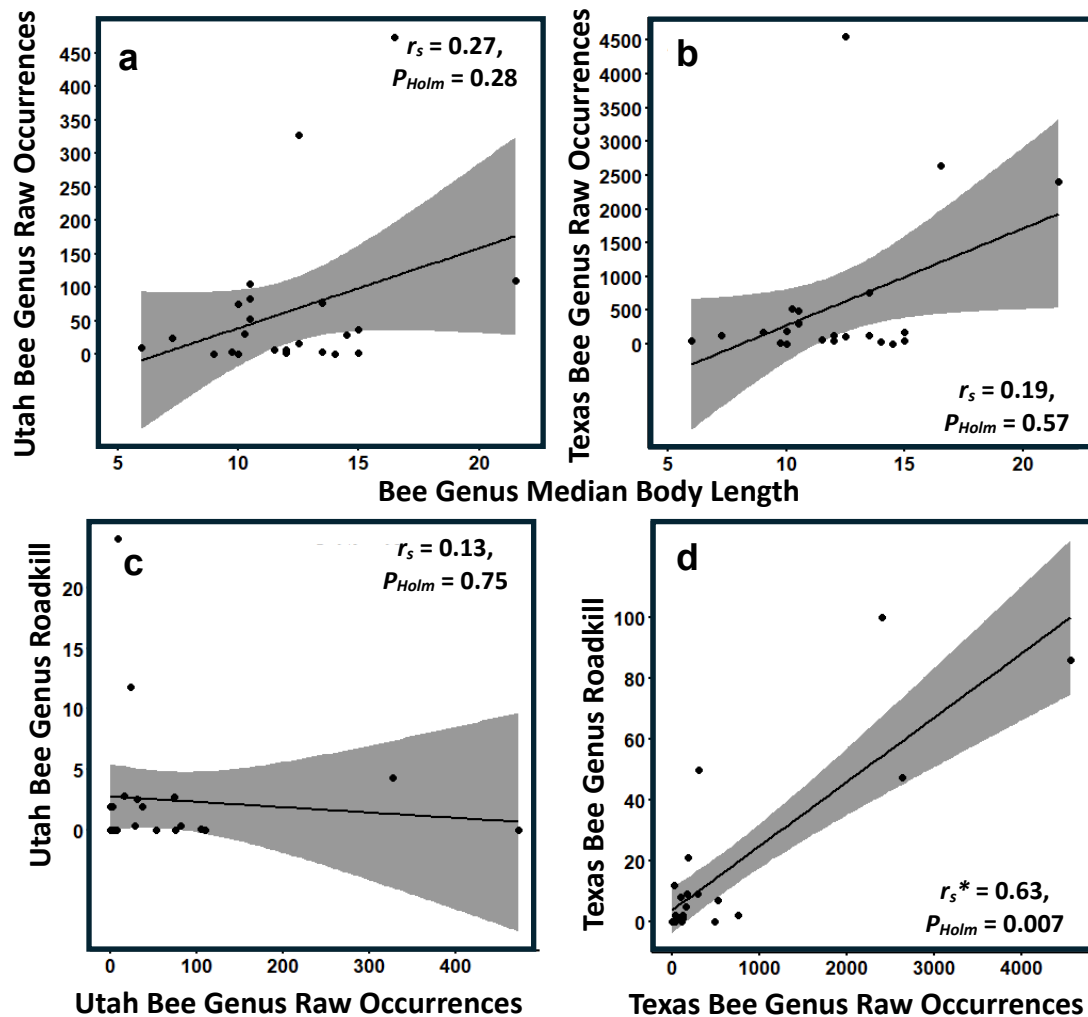

**Fig. S6** Spearman's rank-order correlations ( $r_s$ ) for 23 bee genera between bee genera median body lengths (mm) and (a-b) raw occurrences (iNaturalist 2025a) in (a) Utah and (b) Texas; and (c-d) roadkill counts and raw occurrences for (c) Utah and (d) Texas. Asterisk indicates significant  $r_s$  ( $P_{Holm} < 0.05$ ) and shaded areas represent 95% confidence intervals (N = number bees) (see Tables S2–4 for data; see Fig. 12c–f for same charts with human population density sample bias adjusted data)

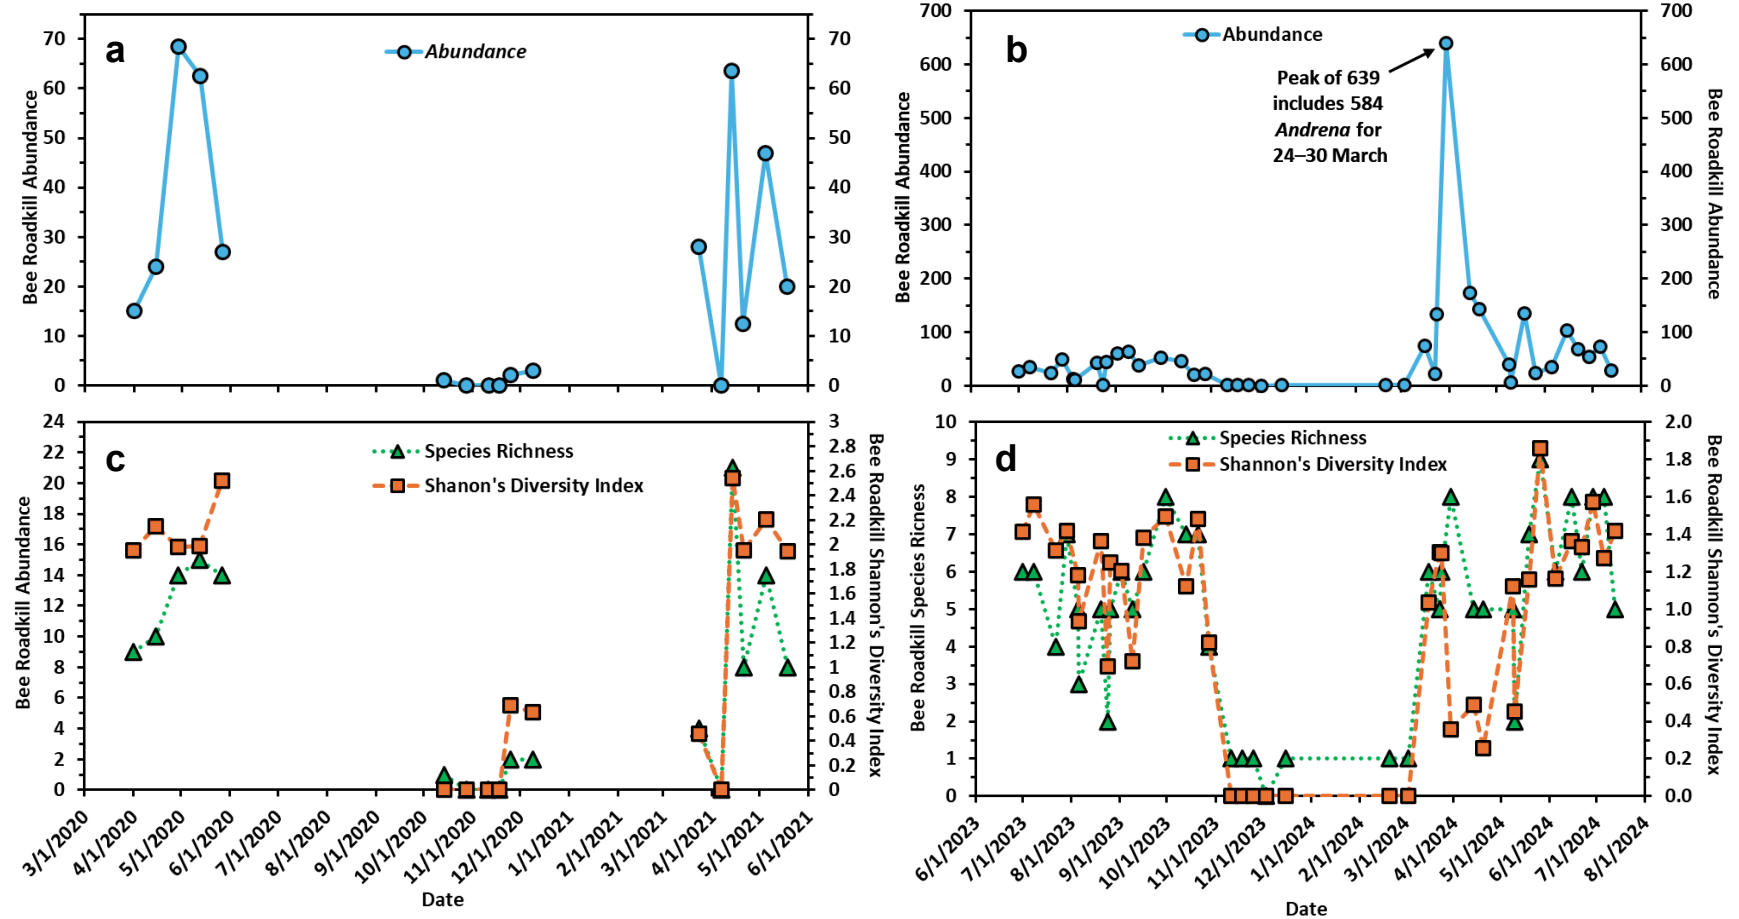

**Fig. S7** Bee roadkill seasonal (a–b) abundance and (c–d) species richness and Shannon's diversity index for taxonomic units from (a,c) Texas weekly totals (this study, N = 374) and (b,d) James White Parkway Bridge, Knoxville, Tennessee (N = 2,310) (Russo 2025)

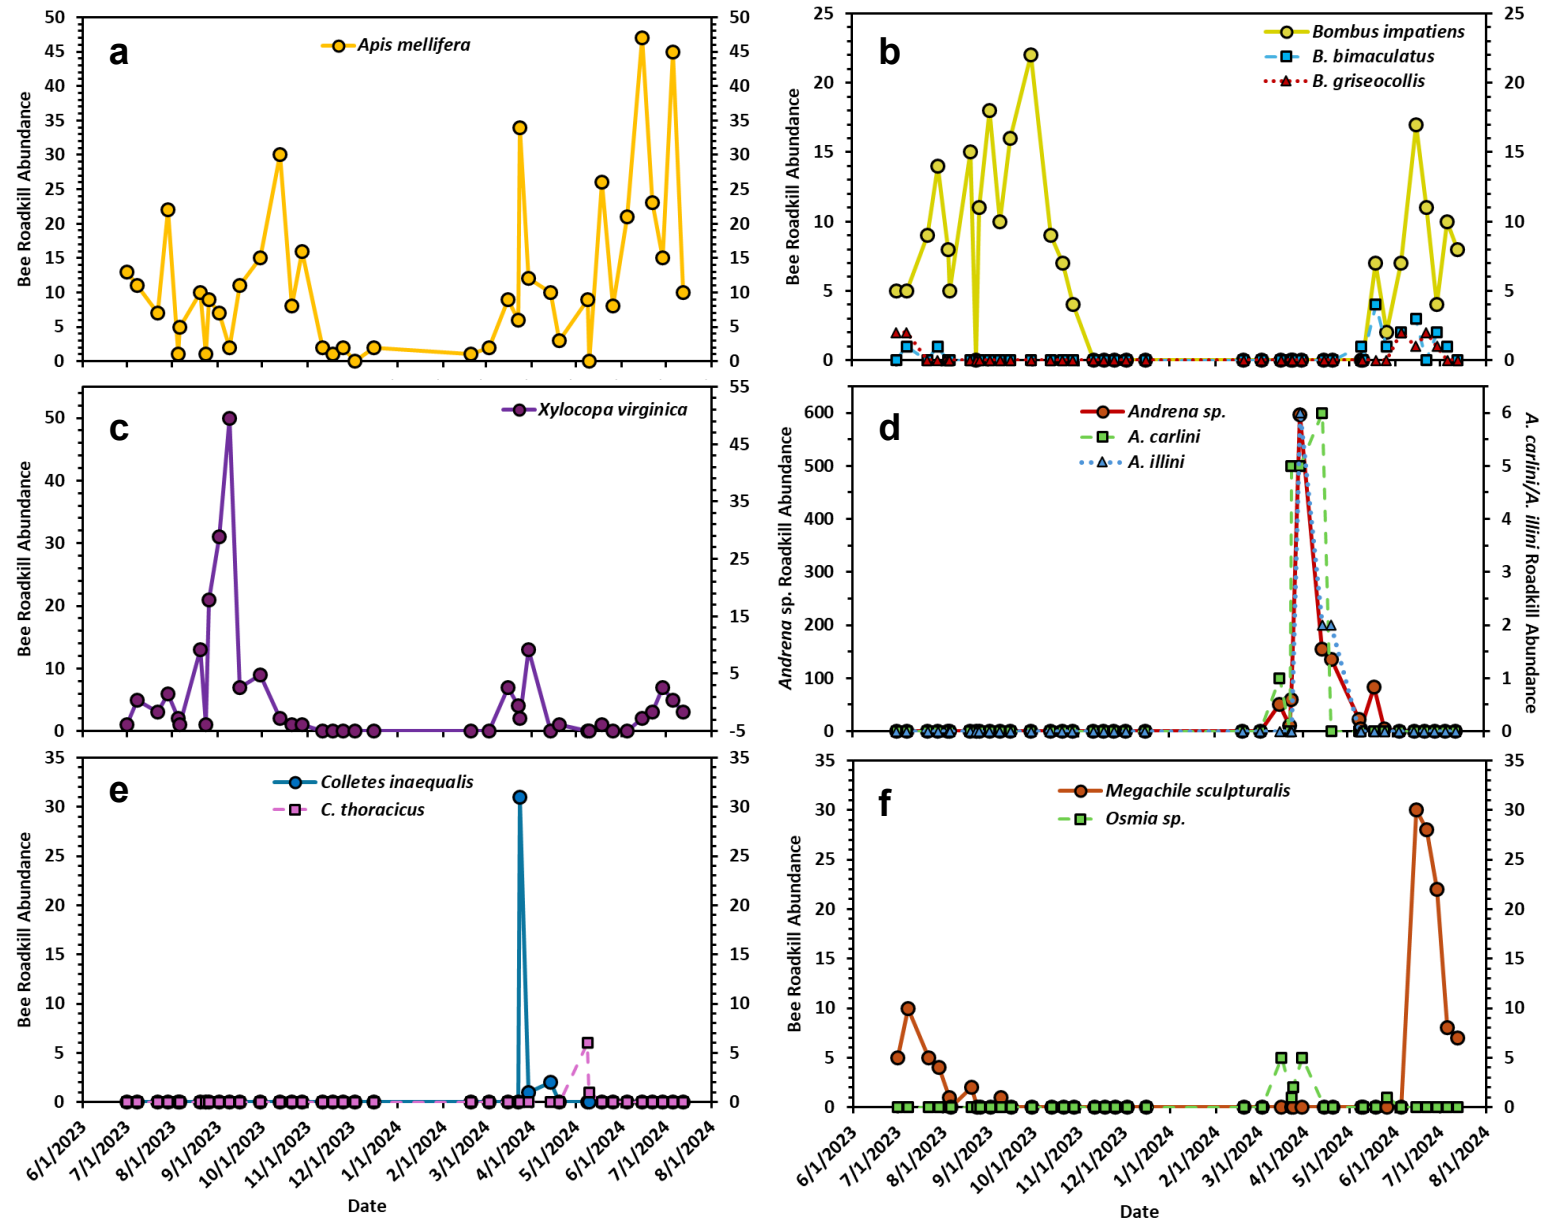

**Fig. S8** Bee roadkill seasonal abundance from Knoxville, Tennessee (Russo 2025): (a) *Apis mellifera*, (b) *Bombus* spp., (c) *Xylocopa virginica*, (d) *Andrena* spp., (e) *Colletes* spp., and (f) *Megachile sculpturalis* and *Osmia* sp.

## Tables

**Table S1** Taxonomic authorities for insect species mentioned in manuscript or Table S4 (alphabetized by order, genus, species).

| Order: Genus: Species                             | Family: Subfamily: Tribe                            |
|---------------------------------------------------|-----------------------------------------------------|
| Hymenoptera (Epifamily Anthophila)                |                                                     |
| <i>Agapostemon angelicus</i> Cockerell, 1924      | Halictidae: Halictinae: Halictini <i>sensu lato</i> |
| <i>Ag. splendens</i> Lepeletier, 1841             | Halictidae: Halictinae: Halictini <i>sensu lato</i> |
| <i>Ag. texana</i> Cresson, 1872                   | Halictidae: Halictinae: Halictini <i>sensu lato</i> |
| <i>Apis mellifera</i> L., 1758                    | Apidae: Apinae: Apini                               |
| <i>Augochloropsis metallica</i> (Fabricius, 1793) | Halictidae: Halictinae: Augochlorini                |
| <i>Bombus affinis</i> (Cresson, 1863)             | Apidae: Apinae: Bombini                             |
| <i>B. cullumanus</i> (Kirby, 1802)                | Apidae: Apinae: Bombini                             |
| <i>B. franklini</i> (Frisson, 1921)               | Apidae: Apinae: Bombini                             |
| <i>B. fraternus</i> (Smith, 1854)                 | Apidae: Apinae: Bombini                             |
| <i>B. griseocollis</i> (DeGeer, 1773)             | Apidae: Apinae: Bombini                             |
| <i>B. impatiens</i> Cresson, 1863                 | Apidae: Apinae: Bombini                             |
| <i>B. pensylvanicus</i> (DeGeer, 1773)            | Apidae: Apinae: Bombini                             |
| <i>B. sonorus</i> Say, 1837                       | Apidae: Apinae: Bombini                             |
| <i>B. suckleyi</i> Greene, 1860                   | Apidae: Apinae: Bombini                             |
| <i>B. terrestris</i> (L., 1758)                   | Apidae: Apinae: Bombini                             |
| <i>Centris atripes</i> Mocsáry, 1899              | Apidae: Apinae: Centridini                          |
| <i>C. caesalpiniae</i> Cockerell, 1897            | Apidae: Apinae: Centridini                          |
| <i>C. thoracicus</i> Smith, 1853                  | Colletidae: Colletinae                              |
| <i>Colletes inaequalis</i> Say, 1837              | Colletidae: Colletinae                              |
| <i>Diadasia rinconis</i> Cockerell, 1897          | Apidae: Eucerinae: Emphorini                        |
| <i>Dieunomia nevadensis</i> (Cresson, 1874)       | Halictidae: Nomiinae: Dieunomiini                   |
| <i>Lithurgopsis littoralis</i> Cockerell, 1817    | Megachilidae: Lithurginae: Lithurgini               |
| <i>Megachile cypricola</i> Mavromoustakis, 1938   | Megachilidae: Megachilinae: Megachilini             |
| <i>M. inimica</i> Cresson, 1872                   | Megachilidae: Megachilinae: Megachilini             |
| <i>M. rotundata</i> (Fabricius, 1787)             | Megachilidae: Megachilinae: Megachilini             |
| <i>M. sculpturalis</i> Smith, 1853                | Megachilidae: Megachilinae: Megachilini             |
| <i>Melissodes tristis</i> Cockerell, 1894         | Apidae: Eucerinae: Eucerini                         |
| <i>Nomia melanderi</i> (Cockerell, 1906)          | Halictidae: Nomiinae: Nomiini                       |
| <i>N. nortoni</i> Cresson, 1868                   | Halictidae: Nomiinae: Nomiini                       |
| <i>Osmia subfasciata</i> , Cresson, 1872          | Megachilidae: Megachilinae: Osmiini                 |
| <i>Perdita meconis</i> Griswold, 1993             | Andrenidae: Panurginae: Panurgini                   |
| <i>Triepeolus penicilliferus</i> (Brues, 1903)    | Apidae: Nomadinae: Epeolini                         |
| <i>Xylocopa micans</i> (Lepeletier, 1841)         | Apidae: Xylocopinae: Xylocopinae                    |
| <i>X. virginica</i> L., 1977                      | Apidae: Xylocopinae: Xylocopinae                    |
| Lepidoptera (Superfamily Papilionoidea)           |                                                     |
| <i>Danaus plexippus</i> (L. 1758)                 | Nymphalidae: Danainae: Danaini                      |

**Table S2** Bee genera body length ranges in North America north of Mexico for taxa found in Utah and Texas roadkill studies

| Taxon: Family, Genus | Body Length (mm) |         |        | Body Length Ranges for North American Subgenera North of Mexico                                                                                                                                                                        | References                 |
|----------------------|------------------|---------|--------|----------------------------------------------------------------------------------------------------------------------------------------------------------------------------------------------------------------------------------------|----------------------------|
|                      | Minimum          | Maximum | Median |                                                                                                                                                                                                                                        |                            |
| <b>Apidae</b>        |                  |         |        |                                                                                                                                                                                                                                        | Michener 2007              |
|                      |                  |         |        | <i>Anthophoroides</i> 10-13 mm, <i>Clisodon</i> 9-13 mm, <i>Heliophila</i> 6-10 mm, <i>Lophanthophora</i> 11-20mm, <i>Melea</i> 13-17 mm, <i>Mystacanthophora</i> 9-16 mm, <i>Paramegilla</i> 9.5-24 mm, <i>Pyganthophora</i> 12-16 mm |                            |
| <i>Anthophora</i>    | 6                | 24      | 15     |                                                                                                                                                                                                                                        | Michener 2007              |
| <i>Apis</i>          | 10               | 15      | 12.5   |                                                                                                                                                                                                                                        | LeBuhn 2013                |
| <i>Bombus</i>        | 10               | 23      | 16.5   |                                                                                                                                                                                                                                        | LeBuhn 2013                |
|                      |                  |         |        | <i>Acritocentris</i> 15-19 mm, <i>Centris</i> 12-24 mm, <i>Paracentris</i> 9-15 mm, <i>Xerocentris</i> 9-17 mm                                                                                                                         |                            |
| <i>Centris</i>       | 9                | 19      | 14     |                                                                                                                                                                                                                                        | Michener 2007              |
| <i>Diadasia</i>      | 5                | 20      | 12.5   |                                                                                                                                                                                                                                        | Michener 2007              |
|                      |                  |         |        | <i>Apomelissodes</i> 9-14 mm, <i>Callimelissodes</i> 7.5-16 mm, <i>Eumelissodes</i> 8-16 mm, <i>Heliomelissodes</i> 9-17 mm, <i>Melissodes</i> 7.5-16 mm, <i>Psilomelissodes</i> 11-13 mm, <i>Melissoptila</i> 6.5-13.5 mm             |                            |
| <i>Melissodes</i>    | 6.5              | 14      | 10.25  |                                                                                                                                                                                                                                        | Michener 2007              |
| <i>Triepeolus</i>    | 7                | 17      | 12     |                                                                                                                                                                                                                                        | LeBuhn 2013                |
| <i>Xylocopa</i>      | 13               | 30      | 21.5   |                                                                                                                                                                                                                                        | Michener 2007; LeBuhn 2013 |
| <b>Halictidae</b>    |                  |         |        |                                                                                                                                                                                                                                        |                            |
| <i>Agapostemon</i>   | 7                | 14      | 10.5   |                                                                                                                                                                                                                                        | Michener 2007              |
| <i>Lasioglossum</i>  | 3.5              | 11      | 7.25   | <i>Dialictus</i> 3.5-8 mm, <i>Hemihalictus</i> 5.5-7.5 mm, <i>Sphecodogastra</i> 7-11mm                                                                                                                                                | Michener 2007              |
| <i>Halictus</i>      | 7                | 14      | 10.5   | <i>Nealictus</i> 10-13 mm, <i>Odontalictus</i> 7-14 mm, <i>Protohalictus</i> 9-13 mm                                                                                                                                                   | Michener 2007              |
| <i>Sphecodes</i>     | 4.5              | 15      | 9.75   |                                                                                                                                                                                                                                        | Michener 2007              |

**Table S2** Bee genera body length ranges in North America north of Mexico for taxa found in Utah and Texas roadkill studies

| Taxon: Family, Genus  | Body Length (mm) |         |        | Body Length Ranges for North American Subgenera North of Mexico                                                                                                                                                                                                                                                                                                    | References                                                                                          |
|-----------------------|------------------|---------|--------|--------------------------------------------------------------------------------------------------------------------------------------------------------------------------------------------------------------------------------------------------------------------------------------------------------------------------------------------------------------------|-----------------------------------------------------------------------------------------------------|
|                       | Minimum          | Maximum | Median |                                                                                                                                                                                                                                                                                                                                                                    |                                                                                                     |
| <i>Augochloropsis</i> | 5                | 13      | 9      |                                                                                                                                                                                                                                                                                                                                                                    | Michener 2007                                                                                       |
| <i>Dieunomia</i>      | 7                | 23      | 15     |                                                                                                                                                                                                                                                                                                                                                                    | Michener 2007                                                                                       |
| <i>Nomia</i>          | 8                | 16      | 12     | <i>Acunomia</i> 8-16 mm                                                                                                                                                                                                                                                                                                                                            | Michener 2007                                                                                       |
| <b>Andrenidae</b>     |                  |         |        |                                                                                                                                                                                                                                                                                                                                                                    |                                                                                                     |
|                       |                  |         |        | LaBerge 1977: Thysandrena 6-11, Rhacandrena 7-10, Euandrena 6-11; Bouseman and LaBerge 1978: Melandrena 7-17; LaBerge 1980: Andrena 6.5-14; LaBerge 1985: Dactylandrena 9-13 mm, Notandrena 6-8 mm, Archiandrena 7-12 mm, Anchandrena 6-12 mm, Erandrena 9-11 mm, Belandrena 7-10mm, Iomelissa 7-11 mm, Holandrena 3-11 mm, Conandrena 8-11 mm, Genyandrena 8-10mm |                                                                                                     |
|                       |                  |         |        | Oligandrena 7.5-13 mm, Augandrena 6-10mm; LaBerge 1986: Leucandrena 8-14; Ptilandrena: 6-11; LaBerge 1989: Simandrena 5-12; Thorp and LaBerge 2005a: Onagandrena 8-15 mm; Thorp and LaBerge 2005b: Hesperandrena 6-10 mm                                                                                                                                           | LaBerge 1977; Bouseman and LaBerge 1978; LaBerge 1980, 1985, 1986, 1989; Thorp and LaBerge 2005a, b |
| <i>Andrena</i>        | 3                | 17      | 10     |                                                                                                                                                                                                                                                                                                                                                                    |                                                                                                     |
| <i>Perdita</i>        | 2                | 10      | 6      |                                                                                                                                                                                                                                                                                                                                                                    | Michener 2007                                                                                       |
| <b>Megachilidae</b>   |                  |         |        |                                                                                                                                                                                                                                                                                                                                                                    |                                                                                                     |
| <i>Lithurgopsis</i>   | 8                | 19      | 13.5   |                                                                                                                                                                                                                                                                                                                                                                    | Michener 2007                                                                                       |
|                       |                  |         |        | <i>Argyropile</i> 9-16 mm, <i>Chelostomoides</i> 7-17 mm, <i>Leptorachis</i> ( <i>M. petulans</i> ) 8-17mm, <i>Litomegachile</i> 8-17mm, <i>Megachile</i> 7-20mm, <i>Megachiloides</i> 9-17mm, <i>Melanosarus</i> 10-16 mm, <i>Neocheylnia</i> 6.5-10 mm, <i>Pseudocentron</i> 8-16 mm                                                                             |                                                                                                     |
| <i>Megachile</i>      | 7                | 20      | 13.5   |                                                                                                                                                                                                                                                                                                                                                                    | Michener 2007                                                                                       |

**Table S2** Bee genera body length ranges in North America north of Mexico for taxa found in Utah and Texas roadkill studies

| Taxon: Family, Genus | Body Length (mm) |         |        | Body Length Ranges for North American Subgenera North of Mexico                                                                                                                                        | References                    |
|----------------------|------------------|---------|--------|--------------------------------------------------------------------------------------------------------------------------------------------------------------------------------------------------------|-------------------------------|
|                      | Minimum          | Maximum | Median |                                                                                                                                                                                                        |                               |
| <i>Osmia</i>         | 4                | 17      | 10.5   | <i>Acanthosioides</i> 6-14 mm, <i>Cephalosmia</i> 8-17 mm, <i>Diceratosmia</i> 4-8 mm, <i>Helicosmia</i> 7.5-15 mm, <i>Melanosmia</i> 6-14 mm, <i>Mystacosmia</i> 8-12 mm, <i>Trichinosmia</i> 9-10 mm | Michener 2007                 |
| <i>Anthidium</i>     | 11               | 18      | 14.5   | <i>Callanthidium</i> 11-18 mm                                                                                                                                                                          | Michener 2007                 |
| <b>Colletidae</b>    |                  |         |        |                                                                                                                                                                                                        |                               |
| <i>Colletes</i>      | 7                | 16      | 11.5   |                                                                                                                                                                                                        | Michener 2007;<br>LeBuhn 2013 |
| <b>Mellitidae</b>    |                  |         |        |                                                                                                                                                                                                        |                               |
| <i>Hesperapis</i>    | 4                | 16      | 10     | <i>Amblyapis</i> 4-9 mm, <i>Carinapis</i> 7-16 mm, <i>Disparapis</i> 8-14 mm, <i>Hesperapis</i> 4-7 mm, <i>Panurgomia</i> 7-15 mm, <i>Xeralitoides</i> 7-10mm, <i>Zacesta</i> 4-7 mm                   | Michener 2007                 |



**Table S3** Bee genera median body lengths and roadkill and occurrence frequency counts in Utah and Texas study areas (Fig. S1)<sup>a</sup>

| Genus                 | Median Body Length (mm) <sup>a</sup> | Roadkill Frequency (%)                                 |                     | 2018–2021 Occurrence Frequency (iNaturalist 2025a) |                      |                                                                                 |                        |
|-----------------------|--------------------------------------|--------------------------------------------------------|---------------------|----------------------------------------------------|----------------------|---------------------------------------------------------------------------------|------------------------|
|                       |                                      | Utah Vehicle-Mounted Sticky Traps (Wilson et al. 2024) |                     | Texas Roadside Transects (This Study)              |                      | Normalized Human Population Sample Bias Adjusted ( <i>HBRWtN</i> ) <sup>b</sup> |                        |
|                       |                                      |                                                        |                     | Raw                                                |                      |                                                                                 |                        |
|                       |                                      |                                                        |                     | Utah                                               | Texas                | Utah                                                                            | Texas                  |
| <i>Perdita</i>        | 6                                    | 18 (35.3%)                                             | 0 (0.0%)            | 9 (0.6%)                                           | 43 (0.3%)            | 17.7 (0.8%)                                                                     | 70.9 (0.6%)            |
| <i>Lasioglossum</i>   | 7.25                                 | 11 (21.6%)                                             | 0 (0.0%)            | 24 (1.6%)                                          | 120 (0.9%)           | 54 (2.5%)                                                                       | 137.9 (1.1%)           |
| <i>Augochloropsis</i> | 9                                    | 0 (0.0%)                                               | 9 (2.5%)            | 0 (0.0%)                                           | 173 (1.3%)           | 0 (0.0%)                                                                        | 169.8 (1.3%)           |
| <i>Andrena</i>        | 9                                    | 3 (5.9%)                                               | 21 (5.8%)           | 3 (0.2%)                                           | 11 (0.1%)            | 3.9 (0.2%)                                                                      | 11.5 (0.1%)            |
| <i>Sphecodes</i>      | 9.75                                 | 1 (2.0%)                                               | 0 (0.0%)            | 74 (5.0%)                                          | 188 (1.4%)           | 149.3 (7.0%)                                                                    | 194.6 (1.5%)           |
| <i>Hesperapis</i>     | 10                                   | 1 (2.0%)                                               | 0 (0.0%)            | 0 (0.0%)                                           | 2 (0.0%)             | 0 (0.0%)                                                                        | 3.5 (0.0%)             |
| <i>Melissodes</i>     | 10.25                                | 4 (7.8%)                                               | 7 (1.9%)            | 31 (2.1%)                                          | 529 (4.0%)           | 40.5 (1.9%)                                                                     | 323.9 (2.6%)           |
| <i>Agapostemon</i>    | 10.5                                 | 0 (0.0%)                                               | 50 (13.7%)          | 53 (3.6%)                                          | 309 (2.3%)           | 62.3 (2.9%)                                                                     | 423.2 (3.4%)           |
| <i>Halictus</i>       | 10.5                                 | 1 (2.0%)                                               | 0 (0.0%)            | 105 (7.1%)                                         | 494 (3.7%)           | 89.3 (4.2%)                                                                     | 304.8 (2.4%)           |
| <i>Osmia</i>          | 10.5                                 | 1 (2.0%)                                               | 9 (2.5%)            | 82 (5.6%)                                          | 298 (2.3%)           | 177.1 (8.4%)                                                                    | 190.3 (1.5%)           |
| <i>Colletes</i>       | 11.5                                 | 0 (0.0%)                                               | 1 (0.3%)            | 6 (0.4%)                                           | 62 (0.5%)            | 14.5 (0.7%)                                                                     | 68.4 (0.5%)            |
| <i>Nomia</i>          | 12                                   | 1 (2.0%)                                               | 2 (0.5%)            | 1 (0.1%)                                           | 39 (0.3%)            | 0.2 (0.0%)                                                                      | 67.2 (0.5%)            |
| <i>Triepeolus</i>     | 12                                   | 0 (0.0%)                                               | 1 (0.3%)            | 7 (0.5%)                                           | 123 (0.9%)           | 10.9 (0.5%)                                                                     | 126.5 (1.0%)           |
| <i>Apis</i>           | 12.5                                 | 5 (9.8%)                                               | 86 (23.6%)          | 328 (22.3%)                                        | 4,556 (34.4%)        | 260.9 (12.3%)                                                                   | 3,898.1 (31.0%)        |
| <i>Diadasia</i>       | 12.5                                 | 2 (3.9%)                                               | 8 (2.2%)            | 16 (1.1%)                                          | 107 (0.8%)           | 32.3 (1.5%)                                                                     | 179.8 (1.4%)           |
| <i>Lithurgopsis</i>   | 13.5                                 | 0 (0.0%)                                               | 2 (0.5%)            | 4 (0.3%)                                           | 124 (0.9%)           | 13.9 (0.7%)                                                                     | 152.9 (1.2%)           |
| <i>Megachile</i>      | 13.5                                 | 1 (2.0%)                                               | 2 (0.5%)            | 76 (5.2%)                                          | 766 (5.8%)           | 115.1 (5.4%)                                                                    | 689.7 (5.5%)           |
| <i>Centris</i>        | 14                                   | 0 (0.0%)                                               | 12 (3.3%)           | 0 (0.0%)                                           | 24 (0.2%)            | 0 (0.0%)                                                                        | 40.1 (0.3%)            |
| <i>Anthidium</i>      | 14.5                                 | 1 (2.0%)                                               | 0 (0.0%)            | 29 (2.0%)                                          | 7 (0.1%)             | 19.2 (0.9%)                                                                     | 8.1 (0.1%)             |
| <i>Dieunomia</i>      | 15                                   | 0 (0.0%)                                               | 2 (0.5%)            | 1 (0.1%)                                           | 41 (0.3%)            | 3.5 (0.2%)                                                                      | 66.3 (0.5%)            |
| <i>Anthophora</i>     | 15                                   | 1 (2.0%)                                               | 5 (1.4%)            | 37 (2.5%)                                          | 168 (1.3%)           | 101.7 (4.8%)                                                                    | 242.2 (1.9%)           |
| <i>Bombus</i>         | 16.5                                 | 0 (0.0%)                                               | 47.5 (13.0%)        | 474 (32.2%)                                        | 2,639 (19.9%)        | 830.9 (39.2%)                                                                   | 3,113 (24.7%)          |
| <i>Xylocopa</i>       | 21.5                                 | 0 (0.0%)                                               | 100 (27.4%)         | 110 (7.5%)                                         | 2,406 (18.2%)        | 122 (5.8%)                                                                      | 2,097.1 (16.7%)        |
| <b>Totals</b>         |                                      | <b>51 (100%)</b>                                       | <b>364.5 (100%)</b> | <b>1,470 (100%)</b>                                | <b>13,229 (100%)</b> | <b>2,119.1 (100%)</b>                                                           | <b>12,579.9 (100%)</b> |

<sup>a</sup>Median body lengths from Table S2. Texas roadkill frequency from Table S4.<sup>b</sup>Sample bias adjusted Utah and Texas data were normalized to equal the total of raw Utah and Texas data, which was 14,499.

**Table S4** Texas bee (Hymenoptera: Anthophila) taxa roadkill frequency per 0.1 km transect per one side of road, roadkill percent, and estimated roadkill extrapolated along both sides roads in survey areas for combined road classes per season and year (Fig. 1a)

| Roadkill Bee Taxon: Family,<br>Subfamily, Tribe,<br>Genus/Species (where<br>available) | Season/Year (N transects) Roadkill Frequency; Roadkill Percent <sup>a</sup> ;<br>Estimated Roadkill <sup>b</sup> per Smallest Taxon [ <i>per Family</i> ] ( <i>per Subfamily</i> ) {Per<br>Tribe} <sup>c</sup> |                                         |                                      | Total Roadkill<br>Frequency; Total<br>Roadkill Percent per<br>Smallest Taxon [ <i>per<br/>Family</i> ] ( <i>per<br/>Subfamily</i> ) {Per<br>Tribe} <sup>c</sup> |
|----------------------------------------------------------------------------------------|----------------------------------------------------------------------------------------------------------------------------------------------------------------------------------------------------------------|-----------------------------------------|--------------------------------------|-----------------------------------------------------------------------------------------------------------------------------------------------------------------|
|                                                                                        | Autumn 2020 (90)                                                                                                                                                                                               | Spring 2020 (121)                       | Spring 2021 (188)                    |                                                                                                                                                                 |
| <b>Apidae</b>                                                                          | <b>[5; 83.3%;<br/>182,254]</b>                                                                                                                                                                                 | <b>[134; 68.0%;<br/>4,095,681]</b>      | <b>[130.5; 76.3%;<br/>2,584,106]</b> | <b>[269.5; 72.1%]</b>                                                                                                                                           |
| Anthophorinae, Anthophorini                                                            |                                                                                                                                                                                                                |                                         |                                      |                                                                                                                                                                 |
| <i>Anthophora</i> sp.                                                                  | 0; 0%; 0<br>(4; 66.7%;<br>145,804)                                                                                                                                                                             | 0; 0%; 0<br>(72.5; 36.8%;<br>2,215,947) | 5; 2.9%; 99,008                      | 5; 1.3%                                                                                                                                                         |
| Apinae                                                                                 |                                                                                                                                                                                                                |                                         |                                      |                                                                                                                                                                 |
| Apini                                                                                  |                                                                                                                                                                                                                |                                         |                                      |                                                                                                                                                                 |
| <i>Apis mellifera</i>                                                                  | 4; 66.7%; 145,804                                                                                                                                                                                              | 45; 22.8%; 1,375,415                    | 37; 21.6%; 732,658                   | 86; 23.0%                                                                                                                                                       |
| Bombini                                                                                | {0; 0%; 0}                                                                                                                                                                                                     | {21.5; 10.9%; 657,143}                  | {26; 15.2%; 514,841}                 | {47.5; 12.7%}                                                                                                                                                   |
| <i>Bombus pensylvanicus</i>                                                            | 0; 0%; 0                                                                                                                                                                                                       | 11; 5.6%; 336,213                       | 6; 3.5%; 118,809                     | 17; 4.5%                                                                                                                                                        |
| <i>B. griseocollis</i>                                                                 | 0; 0%; 0                                                                                                                                                                                                       | 5; 2.5%; 152,824                        | 8; 4.7%; 158,413                     | 13; 3.5%                                                                                                                                                        |
| <i>B. impatiens</i>                                                                    | 0; 0%; 0                                                                                                                                                                                                       | 2; 1.0%; 61,130                         | 5; 2.9%; 99,008                      | 7; 1.9%                                                                                                                                                         |
| <i>B. sonorus</i>                                                                      | 0; 0%; 0                                                                                                                                                                                                       | 1.5; 0.8%; 45,847                       | 1; 0.6%; 19,802                      | 2.5; 0.7%                                                                                                                                                       |
| <i>B. sp.</i>                                                                          | 0; 0%; 0                                                                                                                                                                                                       | 2; 1.0%; 61,130                         | 6; 3.5%; 118,809                     | 8; 2.1%                                                                                                                                                         |
| Centridini                                                                             | {0; 0%; 0}                                                                                                                                                                                                     | {6; 3.0%; 183,389}                      | {6; 3.5%; 118,809}                   | {12; 3.2%}                                                                                                                                                      |
| <i>Centris atripes</i>                                                                 | 0; 0%; 0                                                                                                                                                                                                       | 0; 0%; 0                                | 3; 1.8%; 59,405                      | 3; 0.8%                                                                                                                                                         |
| <i>C. caesalpiniae</i>                                                                 | 0; 0%; 0                                                                                                                                                                                                       | 0; 0%; 0                                | 1; 0.6%; 19,802                      | 1; 0.3%                                                                                                                                                         |
| <i>C. sp.</i>                                                                          | 0; 0%; 0                                                                                                                                                                                                       | 6; 3.0%; 183,389                        | 2; 1.2%; 39,603                      | 8; 2.1%                                                                                                                                                         |
| Eucerinae                                                                              | (0; 0%; 0)                                                                                                                                                                                                     | (7; 3.6%; 213,953)                      | (10; 5.8%; 198,016)                  | (17; 4.5%)                                                                                                                                                      |
| Emphorini                                                                              | {0; 0%; 0}                                                                                                                                                                                                     | {4; 2.0%; 122,259}                      | {4; 2.3%; 79,206}                    | {8; 2.1%}                                                                                                                                                       |
| <i>Diadasia rinconis</i>                                                               | 0; 0%; 0                                                                                                                                                                                                       | 3; 1.5%; 91,694                         | 0; 0%; 0                             | 3; 0.8%                                                                                                                                                         |
| <i>Dia. sp.</i>                                                                        | 0; 0%; 0                                                                                                                                                                                                       | 1; 0.5%; 30,565                         | 4; 2.3%; 79,206                      | 5; 1.3%                                                                                                                                                         |
| Eucerini                                                                               | {0; 0%; 0}                                                                                                                                                                                                     | {3; 1.5%; 91,694}                       | {6; 3.5%; 118,809}                   | {9; 2.4%}                                                                                                                                                       |
| <i>Melissodes tristis</i>                                                              | 0; 0%; 0                                                                                                                                                                                                       | 2; 1.0%; 61,130                         | 0; 0%; 0                             | 2; 0.5%                                                                                                                                                         |

**Table S4** Texas bee (Hymenoptera: Anthophila) taxa roadkill frequency per 0.1 km transect per one side of road, roadkill percent, and estimated roadkill extrapolated along both sides roads in survey areas for combined road classes per season and year (Fig. 1a)

| Roadkill Bee Taxon: Family,<br>Subfamily, Tribe,<br>Genus/Species (where<br>available) | Season/Year (N transects) Roadkill Frequency; Roadkill Percent <sup>a</sup> ;<br>Estimated Roadkill <sup>b</sup> per Smallest Taxon [ <i>per Family</i> ] ( <i>per Subfamily</i> ) {Per<br>Tribe} <sup>c</sup> |                               |                               | Total Roadkill<br>Frequency; Total<br>Roadkill Percent per<br>Smallest Taxon [ <i>per<br/>Family</i> ] ( <i>per<br/>Subfamily</i> ) {Per<br>Tribe} <sup>c</sup> |
|----------------------------------------------------------------------------------------|----------------------------------------------------------------------------------------------------------------------------------------------------------------------------------------------------------------|-------------------------------|-------------------------------|-----------------------------------------------------------------------------------------------------------------------------------------------------------------|
|                                                                                        | Autumn 2020 (90)                                                                                                                                                                                               | Spring 2020 (121)             | Spring 2021 (188)             |                                                                                                                                                                 |
| <i>Mel. sp.</i>                                                                        | 0; 0%; 0                                                                                                                                                                                                       | 0; 0%; 0                      | 5; 2.9%; 99,008               | 5; 1.3%                                                                                                                                                         |
| Eucerini sp.                                                                           | 0                                                                                                                                                                                                              | 1; 0.5%; 30,565               | 1; 0.6%; 19,802               | 2; 0.5%                                                                                                                                                         |
| Nomadinae, Epeolini                                                                    | (0; 0%; 0)                                                                                                                                                                                                     | (1; 0.5%; 30,565)             | (1; 0.6%; 19,802)             | (2; 0.5%)                                                                                                                                                       |
| <i>Triepeolus penicilliferus</i>                                                       | 0; 0%; 0                                                                                                                                                                                                       | 1; 0.5%; 30,565               | 0; 0%; 0                      | 1; 0.3%                                                                                                                                                         |
| Epeolini sp.                                                                           | 0; 0%; 0                                                                                                                                                                                                       | 0; 0%; 0                      | 1; 0.6%; 19,802               | 1; 0.3%                                                                                                                                                         |
|                                                                                        |                                                                                                                                                                                                                | (53.5; 27.2%;                 |                               |                                                                                                                                                                 |
| Xylocopinae, Xylocopini                                                                | (1; 16.7%; 36,451)                                                                                                                                                                                             | 1,635,216)                    | (45.5; 26.6%; 900,972)        | (100; 26.7%)                                                                                                                                                    |
| <i>Xylocopa micans</i>                                                                 | 0; 0%; 0                                                                                                                                                                                                       | 24.5; 12.4%; 748,837          | 4; 2.3%; 79,206               | 28.5; 7.6%                                                                                                                                                      |
| <i>X. virginica</i>                                                                    | 1; 16.7%; 36,451                                                                                                                                                                                               | 27; 13.7%; 825,249            | 38.5; 22.5%; 762,361          | 66.5; 17.8%                                                                                                                                                     |
| <i>X. sp.</i>                                                                          | 0; 0%; 0                                                                                                                                                                                                       | 2; 1.0%; 61,130               | 3; 1.8%; 59,405               | 5; 1.3%                                                                                                                                                         |
| <b>Halictidae</b>                                                                      | <b>[1; 16.7%; 36,451]</b>                                                                                                                                                                                      | <b>[42; 21.3%; 1,283,721]</b> | <b>[25.5; 14.9%; 504,940]</b> | <b>[68.5; 18.3%]</b>                                                                                                                                            |
| Halictinae                                                                             | (0; 0%; 0)                                                                                                                                                                                                     | (37; 18.8%; 1,130,897)        | (22; 12.9%; 435,635)          | (59; 15.8%)                                                                                                                                                     |
| Halictini <i>sensu lato</i>                                                            | {0; 0%; 0}                                                                                                                                                                                                     | {32; 16.2%; 978,073}          | {18; 10.5%; 356,428}          | {50; 13.4%}                                                                                                                                                     |
| <i>Agapostemon</i>                                                                     |                                                                                                                                                                                                                |                               |                               |                                                                                                                                                                 |
| <i>angelicus/Ag. texanus</i>                                                           | 0; 0%; 0                                                                                                                                                                                                       | 28; 14.2%; 855,814            | 17; 9.9%; 336,627             | 45; 12.0%                                                                                                                                                       |
| <i>Ag. splendens</i>                                                                   | 0; 0%; 0                                                                                                                                                                                                       | 3; 1.5%; 91,694               | 1; 0.6%; 19,802               | 4; 1.1%                                                                                                                                                         |
| <i>Ag. sp.</i>                                                                         | 0; 0%; 0                                                                                                                                                                                                       | 1; 0.5%; 30,565               | 0; 0%; 0                      | 1; 0.3%                                                                                                                                                         |
| Augochlorini                                                                           | {0; 0%; 0}                                                                                                                                                                                                     | {5; 2.5%; 152,824}            | {4; 2.3%; 79,206}             | {9; 2.4%}                                                                                                                                                       |
| <i>Augochloropsis metallica</i>                                                        | 0; 0%; 0                                                                                                                                                                                                       | 5; 2.5%; 152,824              | 0; 0%; 0                      | 5; 1.3%                                                                                                                                                         |
| <i>Au. sp.</i>                                                                         | 0; 0%; 0                                                                                                                                                                                                       | 0; 0%; 0                      | 4; 2.3%; 79,206               | 4; 1.1%                                                                                                                                                         |
| Nomiinae, Dieunomiini                                                                  | (0; 0%; 0)                                                                                                                                                                                                     | (3; 1.5%; 91,694)             | (1; 0.6%; 19,802)             | (4; 1.1%)                                                                                                                                                       |
| <i>Dieunomia nevadensis</i>                                                            | 0; 0%; 0                                                                                                                                                                                                       | 2; 1.0%; 61,130               | 0; 0%; 0                      | 2; 0.5%                                                                                                                                                         |
| Nomiini                                                                                | {0; 0%; 0}                                                                                                                                                                                                     | {1; 0.5%; 30,565}             | {1; 0.6%; 19,802}             | {2; 0.5%}                                                                                                                                                       |
| <i>Nomia nortoni</i>                                                                   | 0; 0%; 0                                                                                                                                                                                                       | 1; 0.5%; 30,565               | 0; 0%; 0                      | 1; 0.3%                                                                                                                                                         |

**Table S4** Texas bee (Hymenoptera: Anthophila) taxa roadkill frequency per 0.1 km transect per one side of road, roadkill percent, and estimated roadkill extrapolated along both sides roads in survey areas for combined road classes per season and year (Fig. 1a)

| Roadkill Bee Taxon: Family,<br>Subfamily, Tribe,<br>Genus/Species (where<br>available) | Season/Year (N transects) Roadkill Frequency; Roadkill Percent <sup>a</sup> ;<br>Estimated Roadkill <sup>b</sup> per Smallest Taxon [ <i>per Family</i> ] ( <i>per Subfamily</i> ) {Per<br>Tribe} <sup>c</sup> |                            |                            | Total Roadkill<br>Frequency; Total<br>Roadkill Percent per<br>Smallest Taxon [ <i>per<br/>Family</i> ] ( <i>per<br/>Subfamily</i> ) {Per<br>Tribe} <sup>c</sup> |
|----------------------------------------------------------------------------------------|----------------------------------------------------------------------------------------------------------------------------------------------------------------------------------------------------------------|----------------------------|----------------------------|-----------------------------------------------------------------------------------------------------------------------------------------------------------------|
|                                                                                        | Autumn 2020 (90)                                                                                                                                                                                               | Spring 2020 (121)          | Spring 2021 (188)          |                                                                                                                                                                 |
| <i>N. sp.</i>                                                                          | 0; 0%; 0                                                                                                                                                                                                       | 0; 0%; 0                   | 1; 0.6%; 19,802            | 1; 0.3%                                                                                                                                                         |
| Unidentified Subfamily                                                                 |                                                                                                                                                                                                                |                            |                            |                                                                                                                                                                 |
| Halictidae sp.                                                                         | 1; 16.7%; 36,451                                                                                                                                                                                               | 2; 1.0%; 61,130            | 2.5; 1.5%; 49,504          | 5.5; 1.5%                                                                                                                                                       |
| <b>Andrenidae</b>                                                                      | <b>[0; 0%; 0]</b>                                                                                                                                                                                              | <b>[11; 5.6%; 336,213]</b> | <b>[11; 6.4%; 217,817]</b> | <b>[22; 5.9%]</b>                                                                                                                                               |
| Andreninae                                                                             |                                                                                                                                                                                                                |                            |                            |                                                                                                                                                                 |
| <i>Andrena sp.</i>                                                                     | 0; 0%; 0                                                                                                                                                                                                       | 11; 5.6%; 336,213          | 10; 5.8%; 198,016          | 21; 5.6%                                                                                                                                                        |
| Unidentified Subfamily                                                                 |                                                                                                                                                                                                                |                            |                            |                                                                                                                                                                 |
| Andrenidae sp.                                                                         | 0; 0%; 0                                                                                                                                                                                                       | 0; 0%; 0                   | 1; 0.6%; 19,802            | 1; 0.3%                                                                                                                                                         |
| <b>Megachilidae</b>                                                                    | <b>[0; 0%; 0]</b>                                                                                                                                                                                              | <b>[10; 5.1%; 305,648]</b> | <b>[3; 1.8%; 59,405]</b>   | <b>[13; 3.5%]</b>                                                                                                                                               |
| Lithurginae, Lithurgini                                                                |                                                                                                                                                                                                                |                            |                            |                                                                                                                                                                 |
| <i>Lithurgopsis littoralis</i>                                                         | 0; 0%; 0                                                                                                                                                                                                       | 1; 0.5%; 30,565            | 1; 0.6%; 19,802            | 2; 0.5%                                                                                                                                                         |
| Megachilinae                                                                           | (0; 0%; 0)                                                                                                                                                                                                     | (9; 4.6%; 275,083)         | (2; 1.2%; 39,603)          | (11; 2.9%)                                                                                                                                                      |
| Megachilini                                                                            | {0; 0%; 0}                                                                                                                                                                                                     | {1; 0.5%; 30,565}          | {1; 0.6%; 19,802}          | {2; 0.5%}                                                                                                                                                       |
| <i>Megachile inimica</i>                                                               | 0; 0%; 0                                                                                                                                                                                                       | 1; 0.5%; 30,565            | 0; 0%; 0                   | 1; 0.3%                                                                                                                                                         |
| <i>Meg. sp.</i>                                                                        | 0; 0%; 0                                                                                                                                                                                                       | 0; 0%; 0                   | 1; 0.6%; 19,802            | 1; 0.3%                                                                                                                                                         |
| Osmiini                                                                                | {0; 0%; 0}                                                                                                                                                                                                     | {8; 4.1%; 244,518}         | {1; 0.6%; 19,802}          | {9; 2.4%}                                                                                                                                                       |
| <i>Osmia subfasciata</i>                                                               | 0; 0%; 0                                                                                                                                                                                                       | 5; 2.5%; 152,824           | 0; 0%; 0                   | 5; 1.3%                                                                                                                                                         |
| <i>O. texana</i>                                                                       | 0; 0%; 0                                                                                                                                                                                                       | 1; 0.5%; 30,565            | 0; 0%; 0                   | 1; 0.3%                                                                                                                                                         |
| <i>O. sp.</i>                                                                          | 0; 0%; 0                                                                                                                                                                                                       | 2; 1.0%; 61,130            | 1; 0.6%; 19,802            | 3; 0.8%                                                                                                                                                         |
| <b>Colletidae</b>                                                                      | <b>[0; 0%; 0]</b>                                                                                                                                                                                              | <b>[0; 0%; 0]</b>          | <b>[1; 0.6%; 19,802]</b>   | <b>[1; 0.3%]</b>                                                                                                                                                |
| <i>Colletes sp.</i>                                                                    | 0; 0%; 0                                                                                                                                                                                                       | 0; 0%; 0                   | 1; 0.6%; 19,802            | 1; 0.3%                                                                                                                                                         |
| <b>Unidentified Family</b>                                                             |                                                                                                                                                                                                                |                            |                            |                                                                                                                                                                 |
| Anthophila sp. <sup>a</sup>                                                            | 0                                                                                                                                                                                                              | 1                          | 0                          | 1                                                                                                                                                               |

**Table S4** Texas bee (Hymenoptera: Anthophila) taxa roadkill frequency per 0.1 km transect per one side of road, roadkill percent, and estimated roadkill extrapolated along both sides roads in survey areas for combined road classes per season and year (Fig. 1a)

| Roadkill Bee Taxon: Family,<br>Subfamily, Tribe,<br>Genus/Species (where<br>available) | Season/Year (N transects) Roadkill Frequency; Roadkill Percent <sup>a</sup> ;<br>Estimated Roadkill <sup>b</sup> per Smallest Taxon [ <i>per Family</i> ] ( <i>per Subfamily</i> ) {Per<br>Tribe} <sup>c</sup> |                                   |                               | Total Roadkill<br>Frequency; Total<br>Roadkill Percent per<br>Smallest Taxon [ <i>per<br/>Family</i> ] ( <i>per<br/>Subfamily</i> ) {Per<br>Tribe} <sup>c</sup> |
|----------------------------------------------------------------------------------------|----------------------------------------------------------------------------------------------------------------------------------------------------------------------------------------------------------------|-----------------------------------|-------------------------------|-----------------------------------------------------------------------------------------------------------------------------------------------------------------|
|                                                                                        | Autumn 2020 (90)                                                                                                                                                                                               | Spring 2020 (121)                 | Spring 2021 (188)             |                                                                                                                                                                 |
| <b>Totals from Smallest Taxa</b>                                                       | <b>[6; 100%;<br/>218,705]</b>                                                                                                                                                                                  | <b>[197; 100%;<br/>6,021,262]</b> | <b>[171; 100%; 3,386,070]</b> | <b>[374; 100%]</b>                                                                                                                                              |
|                                                                                        | Spring-Autumn 2020                                                                                                                                                                                             |                                   |                               |                                                                                                                                                                 |
| <b>2020 Totals</b>                                                                     | <b>203; 100%; 6,696,345 (from Table 1)</b>                                                                                                                                                                     |                                   |                               |                                                                                                                                                                 |

<sup>a</sup>Single unidentified bee (Anthophila) from spring 2021 not included in percentage calculations, estimated roadkill, or totals.

<sup>b</sup>Roadkill estimated from multiplying (Percentage Roadkill per Bee Taxon) x (Overall Mean Bee Roadkill per Side of 0.1 km Roadside Transect from Table 1) x (2 Sides per Road) x (10 Sides of 0.1 km per Kilometers of Road) x (Total Kilometers of Surveyed Road Classes in Survey Area from Table 2). Roadkill per kilometer for each taxon can be estimated by dividing (Roadkill Frequency) / (Number of Transects per Season) and then multiplying by (2 Sides per Road) x (10 Sides of 0.1 km per Kilometers of Road). For example, Spring 2020 roadkill per kilometer for *B. pennsylvanicus* is (11/121)\*2\*10 = 1.82.

<sup>c</sup>Subtotals for various taxa categories are only given if there is more than one taxon in their subcategories.

**Table S5** Bee and bumblebee community species abundance, species richness and Shannon's Diversity in various habitats over US<sup>a</sup>

| Taxa/ Sample Method <sup>b</sup>                    | Location                                     | Habitat                           | Period                                                     | Sample Locations (n)                    | % Bees Identified to Species (% Identified to Genus) <sup>c</sup> | Community Characteristic Range (Average) |                      |                                   | Source                                    |
|-----------------------------------------------------|----------------------------------------------|-----------------------------------|------------------------------------------------------------|-----------------------------------------|-------------------------------------------------------------------|------------------------------------------|----------------------|-----------------------------------|-------------------------------------------|
|                                                     |                                              |                                   |                                                            |                                         |                                                                   | Abundance (N)                            | Species Richness (S) | Shannon's Diversity ( <i>H'</i> ) |                                           |
| Bees                                                |                                              |                                   |                                                            |                                         |                                                                   |                                          |                      |                                   |                                           |
| Blue Vane Traps                                     | Pikes Peak Forest Dynamics Plot, Colorado    | Montane Forest                    | 20 April–4 Sep 2017 (four 3–6 day periods)                 | 1 (pooled over 4 periods)               | 73% (100%)                                                        | 934                                      | 41                   | 2.53                              | Table 1 of Rhoades et al. 2018            |
| Bowl Traps                                          | TNC Boardman Grasslands Preserve, Oregon     | Arid Grassland                    | June–Sep 2014–2016 (2 mos. periods, except June–July 2014) | 18 (pooled over 8 periods)              | 68% (100%)                                                        | 839-3,254 (1,624.5)                      | 13-32 (22.9)         | 0.7-1.4 (1.2)                     | Tables 1, S1 of Smith DiCarlo et al. 2018 |
| Bowl Traps                                          | Boise Mountain, Boise National Forest, Idaho | Montane Forest                    | July 2016, 2018                                            | 2 (pooled over 2 periods)               | 72% (100%)                                                        | 119-345 (232)                            | 17-38 (27.5)         | 2.99-3.44 (3.22)                  | Table 2 of Foote et al. 2020              |
| Bowl Traps                                          | Central Iowa                                 | Soybean and Fruit/Vegetable Farms | 1 July–24 Sep 2015, 15 June–9 Sep 2016                     | 2 (pooled over 2 periods)               | 100% (100%)                                                       | 335-1,102 (718.5)                        | 32-36 (34)           | 2.24-2.54 (2.4)                   | Table S3 of St. St. Claire et al. 2020    |
| Netting and Bowl Traps                              | Southern Iowa/ Northern Missouri             | Grass-lands                       | Late May–Early August 2015–2016                            | 3 grassland types (pooled 4 sites each) | 69% (100%)                                                        | 291–625 (454)                            | 26–41 (34.7)         | 2.28–2.37 (2.32)                  | Supplemental Table 1 of Stein et al. 2020 |
| Netting and Bowl Traps                              | Chicago, Illinois                            | Urban/ Suburban                   | June–Aug 2018 (four samples each urban vs suburban)        | 2 (pooled sites over 4 periods)         | 93% (100%)                                                        | 1,073-1,280 (1,176.5)                    | 55-71 (63)           | 2.95-3.54 (3.25)                  | Table S4 of Gruver and CaraDonna 2021     |
| Netting and Blue Vane Traps                         | Western South Carolina                       | Peach Orchards                    | Early March–First Week April 2021, 2022                    | 2 (pooled over 2 periods)               | 100% (100%)                                                       | 273-378 (325.5)                          | 15-20 (17.5)         | 1.76-2.29 (2.03)                  | Table 1 of Tayal et al. 2025              |
| Overall Range (Overall Average) of Averages (n = 7) |                                              |                                   |                                                            |                                         | % Species: 68%–100% (82.1%)                                       | 232–1,264.5 (5,465)                      | 17.5–63 (34.37)      | 1.2–3.25 (2.42)                   |                                           |

**Table S5** Bee and bumblebee community species abundance, species richness and Shannon's Diversity in various habitats over US<sup>a</sup>

| Taxa/ Sample Method <sup>b</sup>                     | Location                                          | Habitat                      | Period                      | Sample Locations (n)                      | % Bees Identified to Species (% Identified to Genus) <sup>c</sup> | Community Characteristic Range (Average) |                      |                                   | Source                                       |
|------------------------------------------------------|---------------------------------------------------|------------------------------|-----------------------------|-------------------------------------------|-------------------------------------------------------------------|------------------------------------------|----------------------|-----------------------------------|----------------------------------------------|
|                                                      |                                                   |                              |                             |                                           |                                                                   | Abundance (N)                            | Species Richness (S) | Shannon's Diversity ( <i>H'</i> ) |                                              |
| Bumblebees                                           |                                                   |                              |                             |                                           |                                                                   |                                          |                      |                                   |                                              |
| Netting                                              | 15 US States                                      | Agricultural to Semi-natural | 26 June – 10 Aug, 2015      | 31                                        | 100% (100%)                                                       | 78–163 (105.0)                           | 2–9 (5.0)            | 0.05–2.01 (0.96)                  | Appendix 3 Table of Strange and Tripodi 2018 |
| Netting and Release/Field Identification/Photography | Minneapolis-St. Paul Metropolitan Area, Minnesota | Roadsides                    | 6 visits, 15–30 August 2018 | 78 (with bees)                            | 86% (100%)                                                        | 5,304                                    | 13                   | 1.5                               | Table 2-1 of Evans et al. 2019               |
| Netting and Release/Field Identification/Photography | Southern Minnesota                                | Roadside Vegetation          | 18 May–24 Aug 2021          | 3 vegetation types (pooled 19 sites each) | 85% (100%)                                                        | 205-993 (527.7)                          | 9-10 (9.3)           | 1.37-1.66 (1.55)                  | Table S1 of Darst et al. 2023                |

<sup>a</sup>Species abundance, species richness, and Shannon's Diversity based on smallest identified taxonomic units. Calculations from provided lists of counts for all species/taxonomic units.

<sup>b</sup>Dependent on habitat type, bowl traps often favor detecting more species of Halictidae and sometimes Megachilidae, and sometimes disfavor detecting species of Apidae (Larson et al. 2024).

<sup>c</sup>Genera with individuals that were often difficult to identify to species included *Lasioglossum*, *Andrena*, *Melissodes*, *Nomada*, and *Agapostemon*.
